# Supplementary material
Source: PubMed Central journal article supplement (PMC6606869)
Supplement: AEM.00591-19-s0001.pdf [file AEM.00591-19-s0001.pdf]

## Supplemental Material

### 1. *Salmonella* serovars in the world

**Table S1a** Matrices contributions (loadings) to Factors construction for serovars in the world

| Matrixes and continents | Factor 1 (33.37%) | Factor 2 (24.21%) | Factor 3 (12.61%) |
|-------------------------|-------------------|-------------------|-------------------|
| Pork (AF)               | 0.01              | 0.06              | 0.03              |
| Beef (AF)               | 0.04              | 0.06              | 0.01              |
| Poultry (AF)            | 0.00              | 0.17*             | 0.00              |
| Seafood (AF)            | 0.04              | 0.11*             | 0.00              |
| Pork (LA)               | 0.05              | 0.02              | 0.08              |
| Beef (LA)               | 0.06              | 0.01              | 0.14*             |
| Poultry (LA)            | 0.01              | 0.07*             | 0.03              |
| Seafood (LA)            | 0.02              | 0.02              | 0.03              |
| Pork (NA)               | 0.10*             | 0.00              | 0.00              |
| Beef (NA)               | 0.01              | 0.00              | 0.19*             |
| Poultry (NA)            | 0.00              | 0.03              | 0.01              |
| Seafood (NA)            | 0.01              | 0.02              | 0.15*             |
| Pork (AS)               | 0.04              | 0.00              | 0.01              |
| Beef (AS)               | 0.01              | 0.07              | 0.04              |
| Poultry (AS)            | 0.02              | 0.08*             | 0.01              |
| Seafood (AS)            | 0.00              | 0.02              | 0.17*             |
| Pork (EU)               | 0.10*             | 0.03              | 0.01              |
| Beef (EU)               | 0.09*             | 0.03              | 0.01              |
| Poultry (EU)            | 0.01              | 0.10*             | 0.02              |
| Seafood (EU)            | 0.09*             | 0.03              | 0.02              |
| Pork (OC)               | 0.10*             | 0.03              | 0.01              |
| Beef (OC)               | 0.08              | 0.01              | 0.04              |

\*The most important matrices for each factor construction. AF: Africa, LA: Latin America, NA: North America, AS: Asia, EU: Europe, OC: Oceania

**Table S1b** Serovars contributions (loadings) to factors construction for matrices in the world

| Serovars    | Factor 1 (33.37%) | Factor 2 (24.21%) | Factor 3 (12.61%) |
|-------------|-------------------|-------------------|-------------------|
| Agona       | 0.06              | 7.30              | 0.62              |
| Anatum      | 4.11              | 4.75              | 37.84*            |
| Derby       | 2.41              | 4.28              | 3.91              |
| Enteritidis | 10.07             | 24.09*            | 7.40              |
| Hadar       | 16.66             | 11.94             | 4.01              |
| Kentucky    | 6.17              | 1.46              | 3.67              |
| Meleagridis | 0.41              | 8.52              | 6.55              |
| Typhimurium | 58.86*            | 20.12*            | 1.65              |
| Weltevreden | 1.26              | 17.54             | 34.35*            |

\*The most important serovars for each factor construction

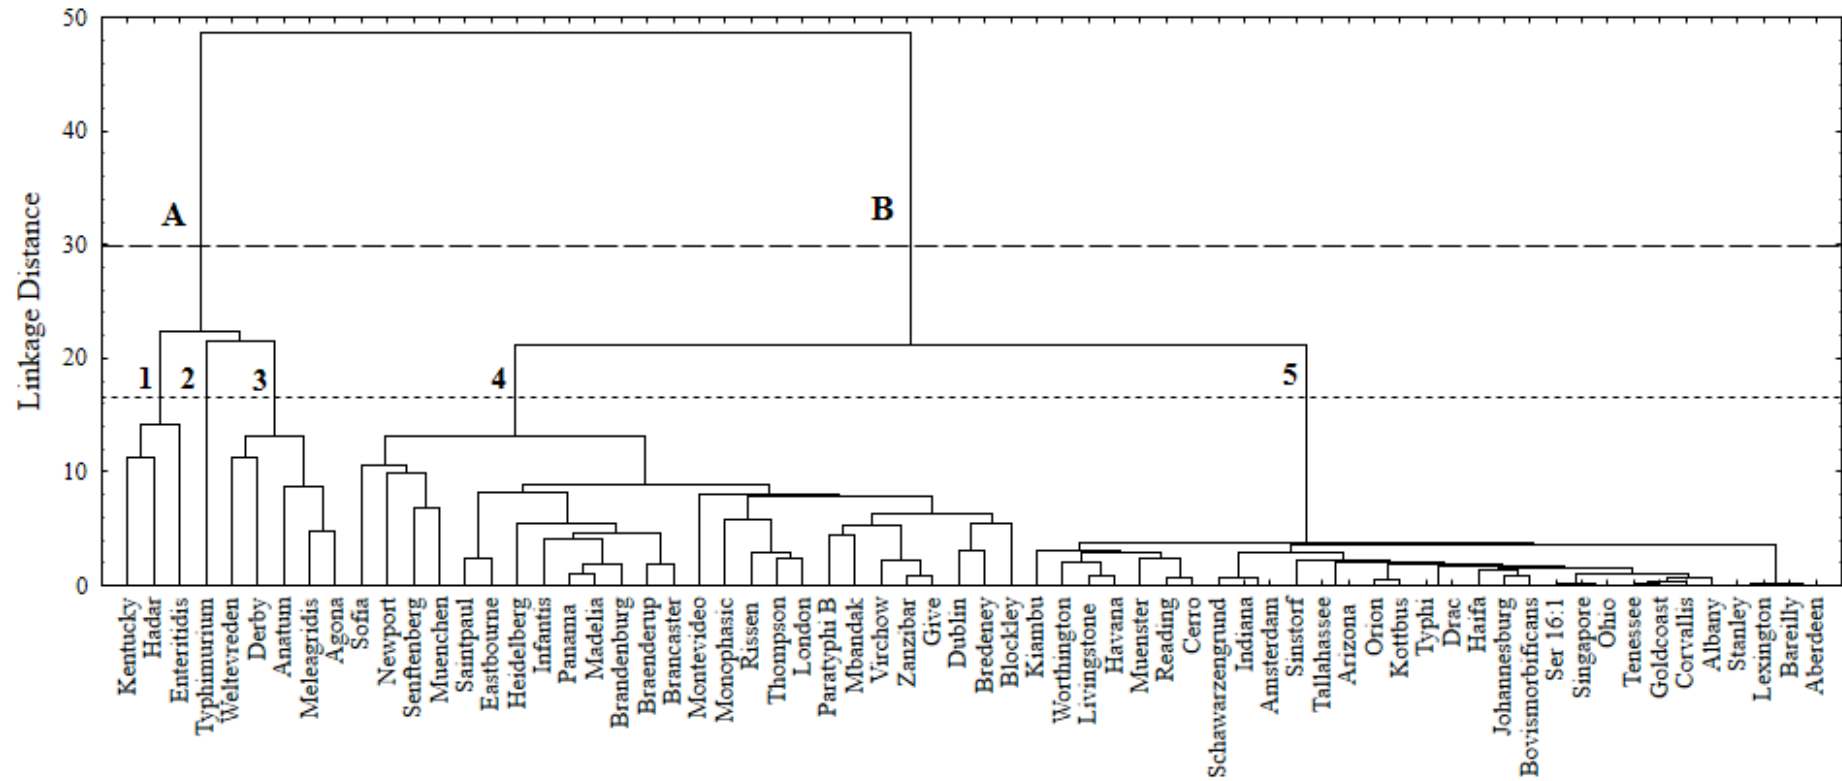

**FIG S1** Cluster analysis of all serovars in the world

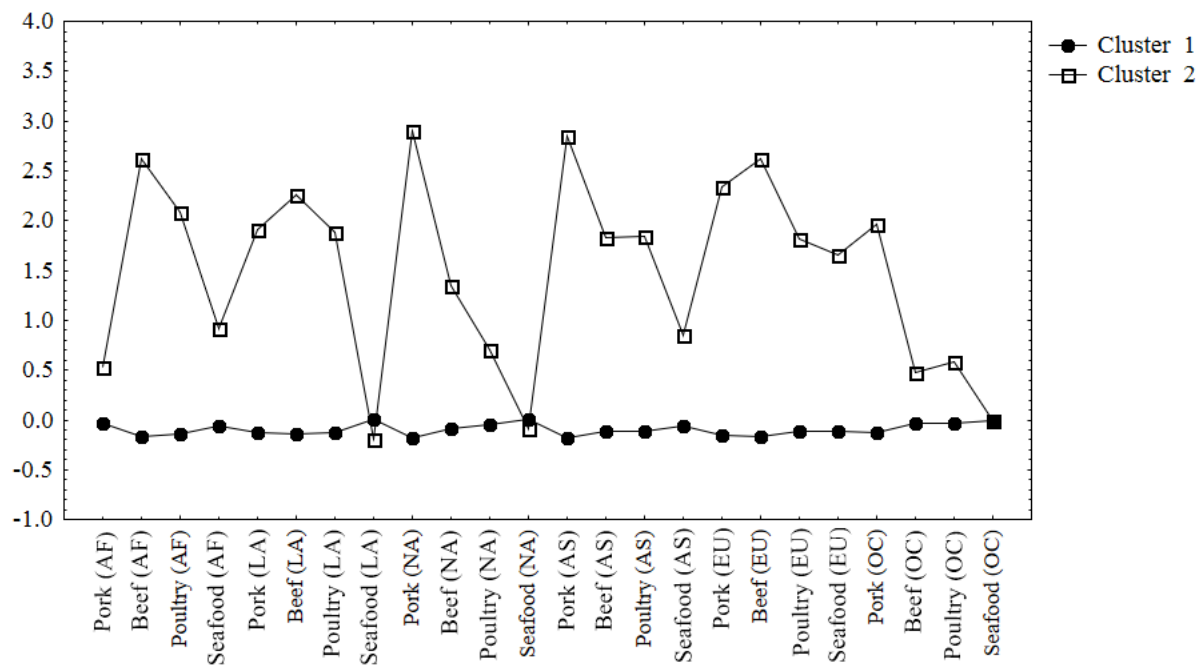

**FIG S2** Prevalence means (Standardized data) for each cluster. AF: Africa, LA: Latin America, NA: North America, AS: Asia, EU: Europe, OC: Oceania

## 2. Pork

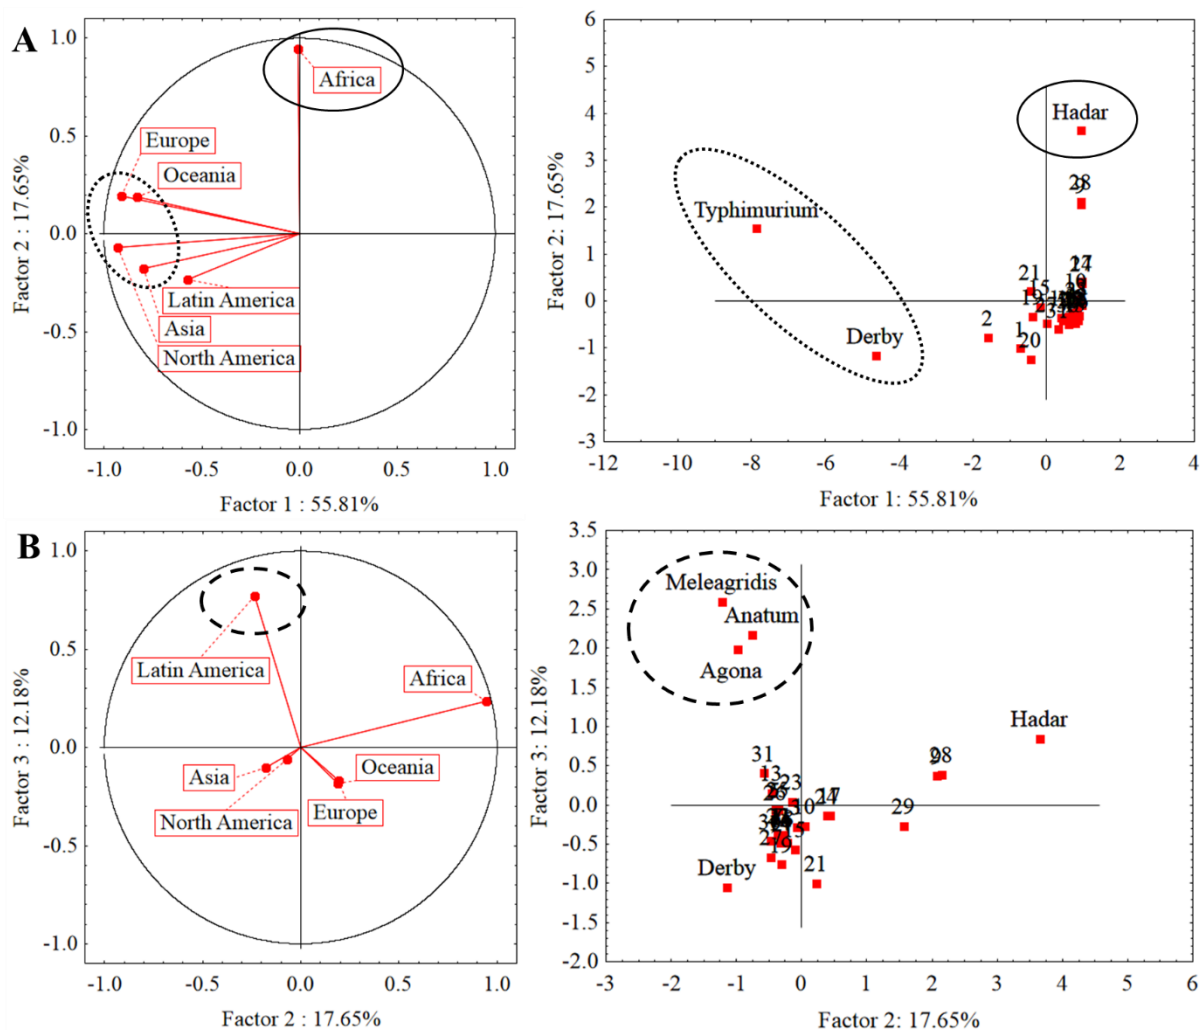

**FIG S3** Principal Components Analysis (PCA) of *Salmonella* serovars in pork

**Table S2a** Serovars contributions (loadings) to Factors construction for pork in the world

| Serovars         | Factor 1 (55.81 %) | Factor 2 (17.65 %) | Factor 3 (12.18 %) |
|------------------|--------------------|--------------------|--------------------|
| Agona            | 0.53               | 3.11               | 18.01*             |
| Anatum           | 2.57               | 1.82               | 21.67*             |
| Blockley         | 0.86               | 0.02               | 0.34               |
| Bovismorbificans | 0.46               | 0.17               | 1.01               |
| Brandenburg      | 0.17               | 0.51               | 0.02               |
| Bredeney         | 0.71               | 0.29               | 0.69               |
| Corvallis        | 0.69               | 0.44               | 0.66               |
| Derby            | 21.57*             | 4.14               | 4.97               |
| Eastbourne       | 0.84               | 13.46              | 0.64               |
| Enteritidis      | 0.61               | 0.00               | 0.32               |
| Goldcoast        | 0.74               | 0.30               | 0.66               |
| Hadar            | 0.82               | 41.90*             | 3.31               |
| Havana           | 0.57               | 0.68               | 0.11               |
| Heidelberg       | 0.14               | 0.36               | 1.03               |
| Infantis         | 0.04               | 0.04               | 1.42               |
| Johannesburg     | 0.35               | 0.33               | 0.87               |

|             |        |       |        |
|-------------|--------|-------|--------|
| Kentucky    | 0.86   | 0.56  | 0.07   |
| Livingstone | 0.65   | 0.26  | 0.74   |
| London      | 0.16   | 0.31  | 2.58   |
| Meleagridis | 0.20   | 4.73  | 30.91* |
| Monophasic  | 0.21   | 0.15  | 4.47   |
| Muenster    | 0.57   | 0.41  | 0.65   |
| Muenchen    | 0.67   | 0.07  | 0.01   |
| Newport     | 0.86   | 0.48  | 0.08   |
| Panama      | 0.38   | 0.41  | 0.01   |
| Reading     | 0.70   | 0.51  | 0.03   |
| Rissen      | 0.00   | 0.71  | 1.98   |
| Saintpaul   | 0.84   | 14.33 | 0.71   |
| Typhimurium | 61.83* | 7.68  | 0.31   |
| Weltevreden | 0.33   | 0.71  | 0.93   |
| Worthington | 0.08   | 1.09  | 0.78   |

\*The most important serovars for each Factor construction.

**Table S2b** Continents contributions (loadings) to Factors construction for pork in the world

| Continents    | Factor 1 (55.81 %) | Factor 2 (17.65 %) | Factor 3 (12.18 %) |
|---------------|--------------------|--------------------|--------------------|
| Africa        | 0.00               | 0.85*              | 0.08               |
| Latin America | 0.10               | 0.05               | 0.82*              |
| North America | 0.26*              | 0.00               | 0.01               |
| Asia          | 0.19*              | 0.03               | 0.01               |
| Europe        | 0.25*              | 0.03               | 0.04               |
| Oceania       | 0.21*              | 0.03               | 0.04               |

\*The most important continent for each Factor construction.

### 3. Poultry

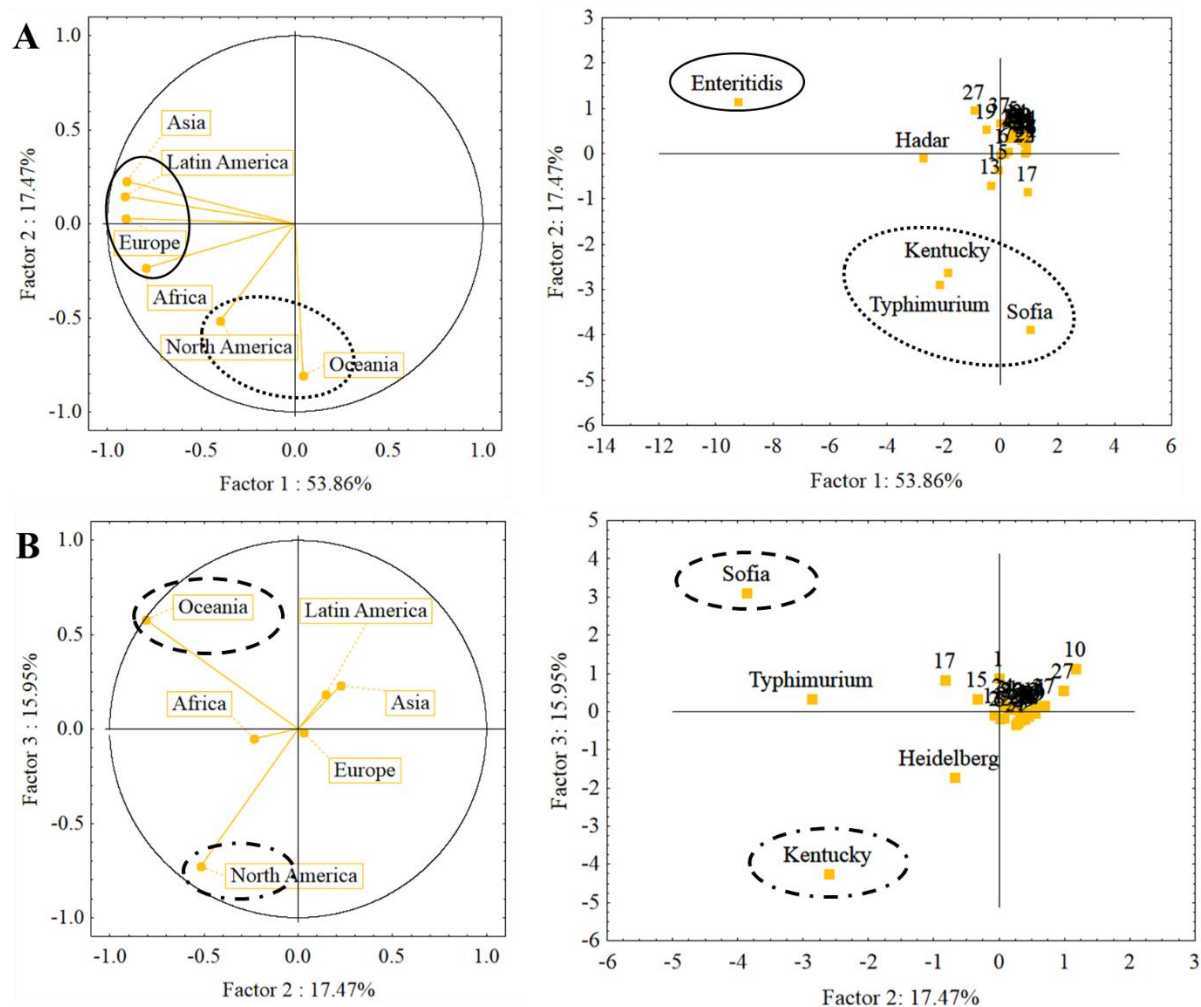

**FIG S4** Principal Components Analysis (PCA) of *Salmonella* serovars in poultry

**Table S3a** Serovars contributions (loadings) to Factors construction for poultry in the world

| Serovars    | Factor 1 (53.86 %) | Factor 2 (17.47 %) | Factor 3 (15.95 %) |
|-------------|--------------------|--------------------|--------------------|
| Agona       | 0.00               | 0.00               | 2.35               |
| Albany      | 0.43               | 0.55               | 0.00               |
| Amsterdam   | 0.30               | 0.76               | 0.01               |
| Anatum      | 0.05               | 0.31               | 0.00               |
| Blockley    | 0.16               | 0.98               | 0.06               |
| Braenderup  | 0.01               | 0.00               | 0.09               |
| Brancaster  | 0.05               | 0.01               | 0.08               |
| Bredeney    | 0.22               | 0.48               | 0.03               |
| Derby       | 0.63               | 0.28               | 0.11               |
| Enteritidis | 73.57*             | 3.60               | 3.77               |
| Hadar       | 6.51               | 0.02               | 0.02               |
| Havana      | 0.14               | 0.50               | 0.03               |
| Heidelberg  | 0.11               | 1.25               | 8.57               |
| Indiana     | 0.28               | 0.79               | 0.02               |
| Infantis    | 0.01               | 0.31               | 0.33               |
| Kentucky    | 3.01               | 18.17*             | 51.88*             |
| Kiambu      | 0.74               | 1.86               | 2.10               |

|                |      |        |        |
|----------------|------|--------|--------|
| Livingstone    | 0.20 | 0.48   | 0.03   |
| Mbandaka       | 0.24 | 0.79   | 0.00   |
| Meleagridis    | 0.46 | 0.54   | 0.00   |
| Monophasic     | 0.58 | 0.16   | 0.29   |
| Montevideo     | 0.59 | 0.00   | 0.06   |
| Muenster       | 0.42 | 0.25   | 0.03   |
| Muenchen       | 0.70 | 0.01   | 0.09   |
| Newport        | 0.48 | 0.29   | 0.03   |
| Ohio           | 0.69 | 0.10   | 0.02   |
| Paratyphi B    | 0.76 | 2.49   | 0.95   |
| Saintpaul      | 0.46 | 0.28   | 0.03   |
| Schwarzengrund | 0.15 | 0.40   | 0.09   |
| Senftenberg    | 0.39 | 0.58   | 0.00   |
| Ser 16:1       | 0.70 | 0.05   | 0.04   |
| Singapore      | 0.69 | 0.11   | 0.01   |
| Sofia          | 0.88 | 39.73* | 28.24* |
| Tennessee      | 0.68 | 0.40   | 0.01   |
| Thompson       | 0.60 | 0.20   | 0.21   |
| Typhimurium    | 4.09 | 22.01* | 0.34   |
| Virchow        | 0.00 | 1.23   | 0.10   |

\*The most important serovars for each Factor construction.

**Table S3b** Continents contributions (loadings) to Factors construction for poultry in the world

| Continents    | Factor 1 (53.86 %) | Factor 2 (17.47 %) | Factor 3 (15.95 %) |
|---------------|--------------------|--------------------|--------------------|
| Africa        | 0.19*              | 0.05               | 0.00               |
| Latin America | 0.25*              | 0.02               | 0.04               |
| North America | 0.05               | 0.25*              | 0.56*              |
| Asia          | 0.25*              | 0.05               | 0.06               |
| Europe        | 0.25*              | 0.00               | 0.00               |
| Oceania       | 0.00               | 0.62*              | 0.35*              |

\*The most important continent for each Factor construction.

## 4. Beef

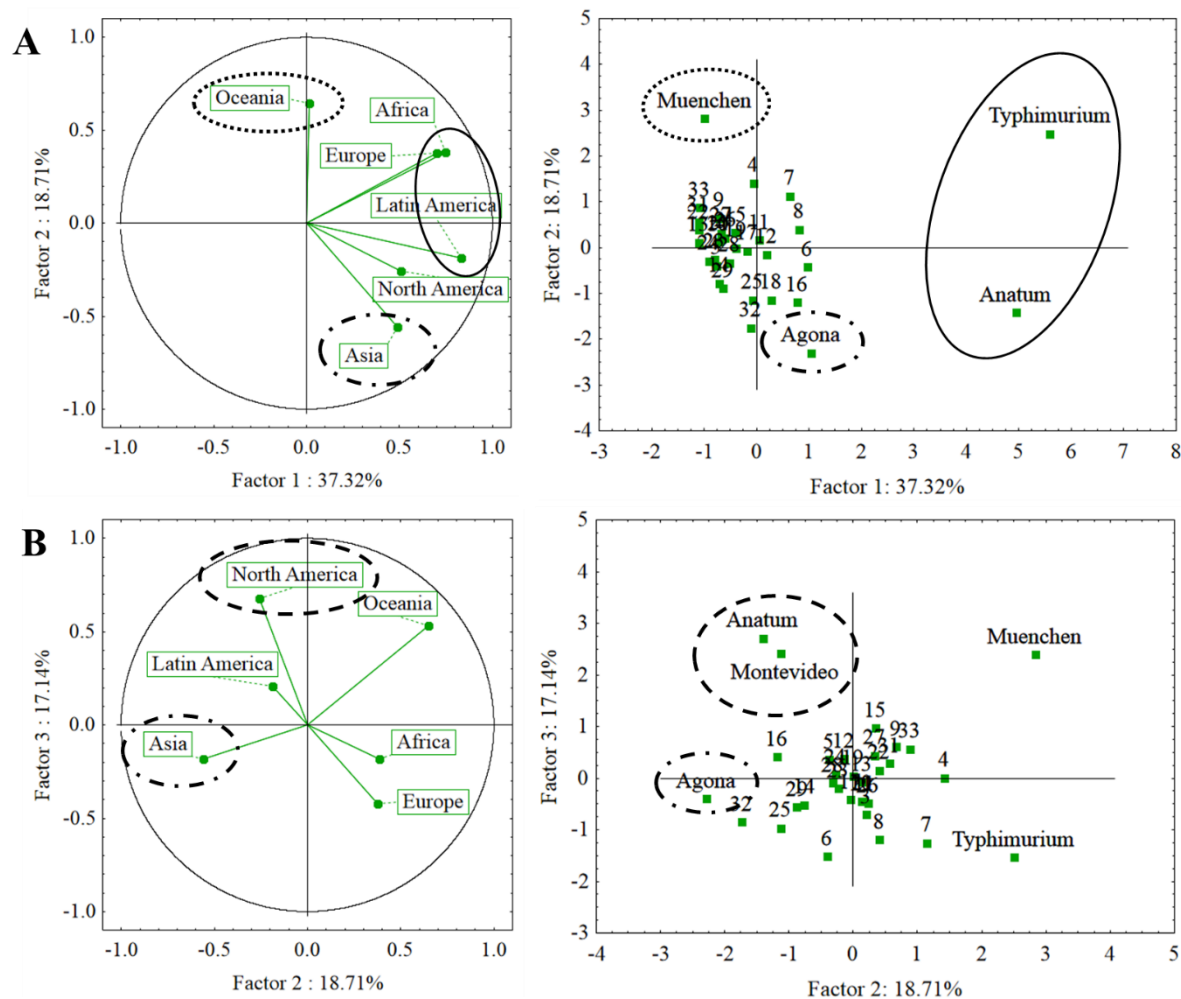

**FIG S5** Principal Components Analysis (PCA) of *Salmonella* serovars in beef

**Table S4a** Serovars contributions (loadings) to Factors construction for beef in the world

| Serovars    | Factor 1 (37.32 %) | Factor 2 (18.71 %) | Factor 3 (17.14 %) |
|-------------|--------------------|--------------------|--------------------|
| Agona       | 1.47               | 14.65*             | 0.45               |
| Anatum      | 34.03*             | 5.54               | 22.45*             |
| Brandenburg | 0.62               | 0.10               | 1.47               |
| Bredeney    | 0.01               | 5.58               | 0.00               |
| Cerro       | 0.83               | 0.42               | 0.42               |
| Derby       | 1.27               | 0.49               | 6.90               |
| Dublin      | 0.55               | 3.61               | 4.72               |
| Enteritidis | 0.89               | 0.46               | 4.26               |
| Give        | 0.73               | 1.19               | 1.17               |
| Haifa       | 0.75               | 0.05               | 0.58               |
| Infantis    | 0.00               | 0.08               | 0.60               |
| Kentucky    | 0.04               | 0.06               | 0.44               |
| Kottbus     | 1.71               | 0.04               | 0.01               |
| London      | 0.73               | 1.63               | 0.79               |
| Mbandaka    | 0.23               | 0.31               | 2.91               |
| Meleagridis | 0.83               | 3.93               | 0.53               |
| Monophasic  | 0.05               | 0.01               | 0.50               |
| Montevideo  | 0.11               | 3.59               | 17.92*             |



|             |        |        |       |
|-------------|--------|--------|-------|
| Muenster    | 0.22   | 0.00   | 0.01  |
| Muenchen    | 1.39   | 22.19* | 17.59 |
| Newport     | 0.73   | 0.05   | 0.59  |
| Orion       | 1.70   | 0.43   | 0.08  |
| Panama      | 0.91   | 0.16   | 0.11  |
| Reading     | 1.17   | 0.22   | 0.02  |
| Rissen      | 0.01   | 3.59   | 2.78  |
| Saintpaul   | 0.51   | 0.14   | 0.71  |
| Senftenberg | 0.65   | 0.29   | 0.60  |
| Sinstorf    | 0.39   | 0.30   | 0.02  |
| Thompson    | 0.59   | 2.17   | 0.92  |
| Typhimurium | 43.49* | 17.29* | 7.05  |
| Virchow     | 1.69   | 0.86   | 0.27  |
| Weltevreden | 0.02   | 8.41   | 2.14  |
| Zanzibar    | 1.67   | 2.15   | 1.01  |

\*The most important serovars for each Factor construction.

**Table S4b** Continents contributions (loadings) to Factors construction for beef in the world

| Continents    | Factor 1 (37.32 %) | Factor 2 (18.71 %) | Factor 3 (17.14 %) |
|---------------|--------------------|--------------------|--------------------|
| Africa        | 0.25*              | 0.13               | 0.03               |
| Latin America | 0.31*              | 0.03               | 0.04               |
| North America | 0.12               | 0.06               | 0.45*              |
| Asia          | 0.11               | 0.28*              | 0.03               |
| Europe        | 0.22*              | 0.13               | 0.18               |
| Oceania       | 0.00               | 0.37*              | 0.27*              |

\*The most important continent for each Factor construction.

## 5. Seafood

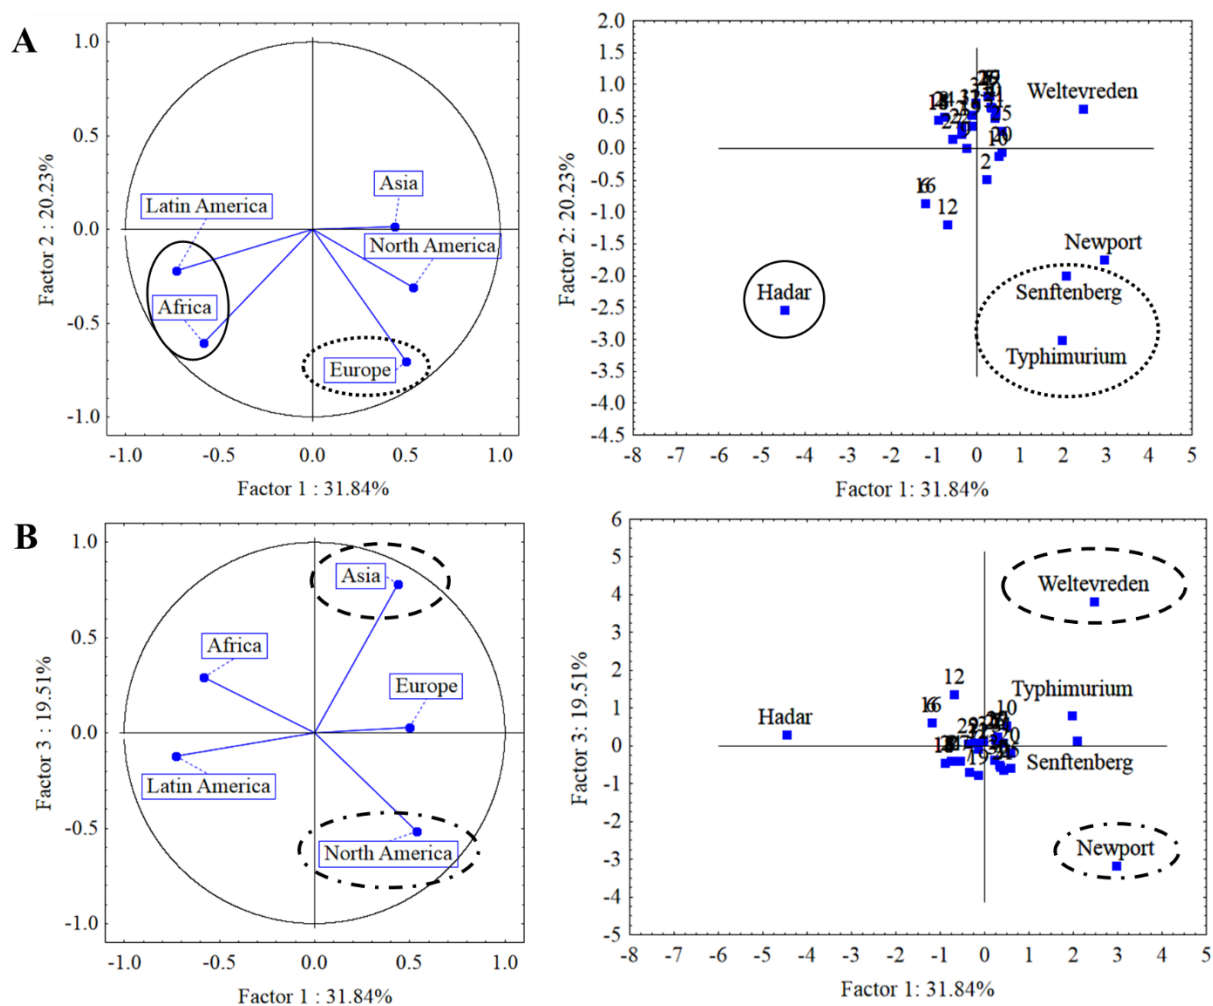

**FIG S6** Principal Components Analysis (PCA) of *Salmonella* serovars in seafood

**Table S5a** Serovars contributions (loadings) to Factors construction for seafood in the world

| Serovars    | Factor 1 (31.84 %) | Factor 2 (20.23 %) | Factor 3 (19.51 %) |
|-------------|--------------------|--------------------|--------------------|
| Aberdeen    | 0.11               | 2.09               | 0.09               |
| Agona       | 0.07               | 0.69               | 0.37               |
| Anatum      | 0.00               | 1.59               | 0.04               |
| Arizona     | 0.21               | 1.22               | 0.86               |
| Bareilly    | 0.13               | 2.10               | 0.14               |
| Blockley    | 2.80               | 2.16               | 1.21               |
| Braenderup  | 0.26               | 0.41               | 1.43               |
| Brandenburg | 1.13               | 0.76               | 0.47               |
| Bredeney    | 0.13               | 0.00               | 0.03               |
| Derby       | 0.43               | 0.04               | 0.99               |
| Drac        | 0.04               | 0.85               | 0.01               |
| Enteritidis | 0.92               | 4.18               | 5.92               |
| Hadar       | 38.33*             | 19.06*             | 0.29               |
| Heidelberg  | 1.59               | 0.61               | 0.54               |
| Infantis    | 1.59               | 0.61               | 0.54               |
| Kentucky    | 2.80               | 2.16               | 1.21               |
| Lexington   | 0.15               | 2.10               | 0.21               |

|             |       |        |        |
|-------------|-------|--------|--------|
| Madelia     | 1.59  | 0.61   | 0.54   |
| Mbandaka    | 0.04  | 0.40   | 1.72   |
| Monophasic  | 0.61  | 0.01   | 0.09   |
| Muenchen    | 0.33  | 1.01   | 1.21   |
| Muenster    | 0.28  | 0.17   | 0.02   |
| Newport     | 16.52 | 8.99   | 30.99* |
| Panama      | 1.13  | 0.76   | 0.47   |
| Paratyphi B | 0.61  | 0.25   | 1.03   |
| Rissen      | 0.12  | 2.10   | 0.11   |
| Saintpaul   | 0.64  | 0.08   | 0.43   |
| Senftenberg | 8.12  | 11.82* | 0.08   |
| Stanley     | 0.15  | 2.10   | 0.23   |
| Tallahassee | 0.18  | 1.29   | 0.76   |
| Thompson    | 0.30  | 0.72   | 0.03   |
| Typhi       | 0.04  | 0.85   | 0.01   |
| Typhimurium | 7.25  | 27.06* | 2.14   |
| Weltevreden | 11.40 | 1.17   | 45.76* |

\*The most important serovars for each Factor construction.

**Table S5b** Continents contributions (loadings) to Factors construction for seafood in the world

| Continents    | Factor 1 (31.84 %) | Factor 2 (20.23 %) | Factor 3 (19.51 %) |
|---------------|--------------------|--------------------|--------------------|
| Africa        | 0.21*              | 0.36*              | 0.09               |
| Latin America | 0.33*              | 0.05               | 0.02               |
| North America | 0.18               | 0.10               | 0.27*              |
| Asia          | 0.12               | 0.00               | 0.62*              |
| Europe        | 0.16               | 0.49*              | 0.00               |

\*The most important continent for each Factor construction.

**TABLE S6 - Reported Serovars - Poultry**

| Continent                                                  | TS     | PS     | PR    | Continent                                            | TS      | PS     | PR    | Continent                                            | TS     | PS    | PR    |
|------------------------------------------------------------|--------|--------|-------|------------------------------------------------------|---------|--------|-------|------------------------------------------------------|--------|-------|-------|
| Latin America                                              | 9,890  | 1,851  | 18.72 | North America                                        | 151,575 | 17,475 | 11.53 | Africa                                               | 7,621  | 1,432 | 18.79 |
| Serotypes                                                  |        | PS     | PR    | Serotypes                                            |         | PS     | PR    | Serotypes                                            |        | PS    | PR    |
| Enteritidis <sup>1-15</sup>                                |        | 752    | 7.60  | Kentucky <sup>24-38, 45</sup>                        |         | 5,897  | 3.89  | Enteritidis <sup>46-65</sup>                         |        | 242   | 3.18  |
| Paratyphi B <sup>2,16-18</sup>                             |        | 249    | 2.52  | Heidelberg <sup>25-27,29-42,45</sup>                 |         | 2,774  | 1.83  | Hadar <sup>48-50,57,60-62,65-71</sup>                |        | 235   | 3.08  |
| Heidelberg <sup>8,9,13,14,16-19</sup>                      |        | 192    | 1.94  | Typhimurium <sup>27-36,38,40,43,45</sup>             |         | 1,779  | 1.17  | Typhimurium <sup>*</sup>                             |        | 212   | 2.78  |
| Typhimurium <sup>5,6,8-11,14,17,19,20</sup>                |        | 113    | 1.14  | Enteritidis <sup>24,25,27,29,31,33,35,38,44,45</sup> |         | 1,239  | 0.82  | Braenderup <sup>65,66,69,72</sup>                    |        | 116   | 1.52  |
| Agona <sup>1,5-8,14,21</sup>                               |        | 116    | 1.17  | Hadar <sup>24,25,27,29-31,33,35,38-41,43,45</sup>    |         | 719    | 0.47  | Brancaster <sup>50,57,67,68</sup>                    |        | 100   | 1.31  |
| Hadar <sup>5,10,11,13,14</sup>                             |        | 100    | 1.01  | Schwarzengrund <sup>27,30,31,35,37,38,45</sup>       |         | 408    | 0.27  | Kentucky <sup>48,50,54,55,57-59,62,68,69,71,73</sup> |        | 101   | 1.33  |
| Infantis <sup>1,5,8,9,11,12,15,21</sup>                    |        | 95     | 0.96  | Monophasic <sup>27,31,33,37,41,45</sup>              |         | 344    | 0.23  | Anatum <sup>54,55,65,66,69,72</sup>                  |        | 55    | 0.72  |
| Mbandaka <sup>1,8,9,11,15,19</sup>                         |        | 60     | 0.61  | Montevideo <sup>24,27,30,31,33,38,39,43,45</sup>     |         | 338    | 0.22  | Infants <sup>51,59,61,62,65,66</sup>                 |        | 44    | 0.58  |
| Senftenberg <sup>5,8,15,19</sup>                           |        | 56     | 0.57  | Thompson <sup>24,27,29-31,33,37,38,45</sup>          |         | 278    | 0.18  | Muenster <sup>49,55,57,71,73</sup>                   |        | 29    | 0.38  |
| Albany <sup>5,7,11,19,20</sup>                             |        | 41     | 0.41  | Infantis <sup>25,27,30,31,33,38,45</sup>             |         | 199    | 0.13  | Saintpaul <sup>46,47,49,62,65,71,72</sup>            |        | 24    | 0.31  |
| Meleagridis <sup>6,7</sup>                                 |        | 43     | 0.43  | Derby <sup>29,39,43,45</sup>                         |         | 172    | 0.11  | Newport <sup>63,69,75</sup>                          |        | 22    | 0.29  |
| Others <sup>1-23</sup>                                     |        | 508    | 5.14  | Others <sup>24-45</sup>                              |         | 2,494  | 1.65  | Others <sup>46-77</sup>                              |        | 397   | 5.21  |
| Continent                                                  | TS     | PS     | PR    | Continent                                            | TS      | PS     | PR    | Continent                                            | TS     | PS    | PR    |
| Asia                                                       | 35,296 | 22,677 | 64.25 | Europe                                               | 28,377  | 2,346  | 8.27  | Oceania                                              | 15,809 | 9,490 | 60    |
| Serotypes                                                  |        | PS     | PR    | Serotypes                                            |         | PS     | PR    | Serotypes                                            |        | PS    | PR    |
| Enteritidis <sup>78-114</sup>                              |        | 4,436  | 12.57 | Enteritidis <sup>132-145</sup>                       |         | 578    | 2.04  | Sofia <sup>148-150</sup>                             |        | 3,398 | 21.49 |
| Hadar <sup>†</sup>                                         |        | 1,907  | 5.40  | Mbandaka <sup>133,137-139,141,145</sup>              |         | 246    | 0.87  | Typhimurium <sup>148,150,151</sup>                   |        | 1,616 | 10.22 |
| Paratyphi B <sup>92,98,111,115,116</sup>                   |        | 1,051  | 2.98  | Kentucky <sup>132,139,141,145</sup>                  |         | 191    | 0.67  | Kiambu <sup>148-150</sup>                            |        | 988   | 6.25  |
| Virchow <sup>79,93,94,97,100,106,107,112,115-120</sup>     |        | 949    | 2.69  | Typhimurium <sup>132-135,139-143,145,146</sup>       |         | 132    | 0.47  | Agona <sup>148,150,151</sup>                         |        | 609   | 3.85  |
| Agona <sup>‡</sup>                                         |        | 801    | 2.27  | Havana <sup>139</sup>                                |         | 105    | 0.37  | Infantis <sup>148,150,151</sup>                      |        | 498   | 3.15  |
| Blockley <sup>78,79,84,86,98,115,119,123</sup>             |        | 755    | 2.14  | Livingstone <sup>138,139,141,142</sup>               |         | 87     | 0.31  | Muenchen <sup>150</sup>                              |        | 273   | 1.73  |
| Schwarzengrund <sup>78,79,98,100,105,115,116,122,124</sup> |        | 638    | 1.81  | Hadar <sup>133,136,137,139-142,145</sup>             |         | 85     | 0.30  | Ser 16:1 <sup>149,150</sup>                          |        | 211   | 1.33  |
| Indiana <sup>78,79,83,89,93,94,98,99,109,121,122,125</sup> |        | 521    | 1.48  | Bredeney <sup>140-142,145</sup>                      |         | 83     | 0.29  | Montevideo <sup>151</sup>                            |        | 181   | 1.14  |
| Amsterdam <sup>100,115,116</sup>                           |        | 483    | 1.37  | Virchow <sup>132,133,137,139,141-143,145,146</sup>   |         | 74     | 0.26  | Ohio <sup>150</sup>                                  |        | 166   | 1.05  |
| Typhimurium <sup>*</sup>                                   |        | 474    | 1.34  | Infantis <sup>132-135,139-142,145,146</sup>          |         | 69     | 0.24  | Singapore <sup>148,150</sup>                         |        | 157   | 0.99  |
| Anatum <sup>78-80,84,90,100,104,105,112,115,119,123</sup>  |        | 470    | 1.33  | Paratyphi B <sup>137,141,142,146</sup>               |         | 51     | 0.18  | Tennessee <sup>148</sup>                             |        | 12    | 0.13  |
| Others <sup>78-132</sup>                                   |        | 7,014  | 19.87 | Others <sup>134-147</sup>                            |         | 652    | 2.30  | Others <sup>148-151</sup>                            |        | 56    | 0.35  |

TS: total samples; PS: positive samples; PR: percentage ratio;

\*47,51,52,54,55,66,71-74,56,62-65,69,75; †78,79,81,83,84,86,88,92,94,98,102,104,106,109,113,115-120; ‡78,79,83,86-88,92,100,103,107,109-112,114,115,118,121,122; \*76,78,79,81,85,88,90,91,93,94,97,98,101,102,104-106,109,110,114,117-119,121,126-128

**TABLE S7 Reported Serovars - Pork**

| Continent                                                        | TS    | PS    | PR    | Continent                                                       | TS     | PS    | PR    | Continent                           | TS    | PS  | PR    |
|------------------------------------------------------------------|-------|-------|-------|-----------------------------------------------------------------|--------|-------|-------|-------------------------------------|-------|-----|-------|
| Latin America                                                    | 3,648 | 1,460 | 40.02 | North America                                                   | 14,133 | 4,882 | 34.54 | Africa                              | 1,863 | 327 | 17.55 |
| Serotypes                                                        |       | PS    | PR    | Serotypes                                                       |        | PS    | PR    | Serotypes                           |       | PS  | PR    |
| Meleagridis <sup>6,7,152</sup>                                   |       | 227   | 6.22  | Typhimurium <sup>27-30,157-162</sup>                            |        | 1,199 | 8.48  | Hadar <sup>165,166</sup>            |       | 121 | 6.49  |
| Anatum <sup>3,6,153</sup>                                        |       | 204   | 5.59  | Derby <sup>27-30,157-159,161-163</sup>                          |        | 1,098 | 7.77  | Saintpaul <sup>69,166</sup>         |       | 75  | 4.03  |
| Agona <sup>6,152-154</sup>                                       |       | 189   | 5.18  | Anatum <sup>27,30,157,158,161</sup>                             |        | 509   | 3.60  | Eastbourne <sup>166,167</sup>       |       | 73  | 3.92  |
| Typhimurium <sup>6,23,153-156</sup>                              |       | 181   | 4.96  | Infantis <sup>27,30,157,158,161-163</sup>                       |        | 416   | 2.94  | Typhimurium <sup>165,166</sup>      |       | 38  | 2.04  |
| Worthington <sup>152-154</sup>                                   |       | 61    | 1.67  | London <sup>27,30,158,160,161</sup>                             |        | 293   | 2.07  | Kentucky <sup>166</sup>             |       | 23  | 1.23  |
| Derby <sup>23,152-156</sup>                                      |       | 53    | 1.45  | Agona <sup>28,30,157,161,162</sup>                              |        | 280   | 1.98  | Newport <sup>165,166</sup>          |       | 22  | 1.18  |
| Havana <sup>153</sup>                                            |       | 38    | 1.04  | Heidelberg <sup>28,30,33,161,162</sup>                          |        | 256   | 1.81  | Anatum <sup>46,69,165,166</sup>     |       | 16  | 0.86  |
| Brandenburg <sup>23,154,156</sup>                                |       | 29    | 0.79  | Worthington <sup>157,160-162</sup>                              |        | 177   | 1.25  | Enteritidis <sup>165,166</sup>      |       | 13  | 0.70  |
| Panama <sup>154,156</sup>                                        |       | 28    | 0.77  | Johannesburg <sup>27,30,33,158,161,163</sup>                    |        | 156   | 1.10  | Blockley <sup>165</sup>             |       | 8   | 0.43  |
| Muenchen <sup>6,156</sup>                                        |       | 24    | 0.66  | Brandenburg <sup>27,161-163</sup>                               |        | 143   | 1.01  | Muenchen <sup>46,166</sup>          |       | 8   | 0.43  |
| Reading <sup>6</sup>                                             |       | 20    | 0.55  | Muenster <sup>158,161</sup>                                     |        | 138   | 0.98  | Infantis <sup>69,166,168</sup>      |       | 7   | 0.38  |
| Others <sup>3,6,23,152-156</sup>                                 |       | 754   | 20.67 | Others <sup>27-30,33,157-160,162-164</sup>                      |        | 911   | 6.25  | Others <sup>46,69,165-168</sup>     |       | 143 | 7.68  |
|                                                                  |       |       |       |                                                                 |        |       |       |                                     |       |     |       |
| Continent                                                        | TS    | PS    | PR    | Continent                                                       | TS     | PS    | PR    | Continent                           | TS    | PS  | RP    |
| Asia                                                             | 6,347 | 2,030 | 31.98 | Europe                                                          | 67,135 | 6,830 | 10.17 | Oceania                             | 7,423 | 517 | 7     |
| Serotypes                                                        |       | PS    | PR    | Serotypes                                                       |        | PS    | PR    | Serotypes                           |       | PS  | PR    |
| Derby <sup>79,80,83,84,87,93,98,105,110,119-122,169-173</sup>    |       | 519   | 8.18  | Typhimurium <sup>132,133,139-143,147,176-195</sup>              |        | 4,437 | 6.61  | Typhimurium <sup>150,198,199</sup>  |       | 151 | 2.03  |
| Typhimurium <sup>*</sup>                                         |       | 253   | 3.99  | Derby <sup>140-143,176-180,182,183,185-197</sup>                |        | 1,365 | 2.03  | Monophasic <sup>150</sup>           |       | 80  | 1.08  |
| Rissen <sup>84,100,103,105,110,112,122,128,169,171-173,175</sup> |       | 155   | 2.44  | Rissen <sup>139,141,179,180,183,186-188,191,196,197</sup>       |        | 320   | 0.48  | London <sup>150,198</sup>           |       | 29  | 0.39  |
| Anatum <sup>†</sup>                                              |       | 139   | 2.19  | Monophasic <sup>132,139,179,182,186,187,191,192,194,197</sup>   |        | 312   | 0.46  | Derby <sup>150,198</sup>            |       | 27  | 0.36  |
| Weltevreden <sup>84,100,110,112,119,128,171,173-175</sup>        |       | 86    | 1.35  | Panama <sup>140,142,177-179,189,194,197</sup>                   |        | 299   | 0.45  | Bovismorbificans <sup>198,199</sup> |       | 17  | 0.23  |
| London <sup>80,84,92,93,98,103,110,119,169,170,172</sup>         |       | 78    | 1.23  | Infantis <sup>140-142,176-179,183,184,189,192-194,197</sup>     |        | 275   | 0.41  | Agona <sup>150,199,200</sup>        |       | 14  | 0.19  |
| Meleagridis <sup>83,94,169,172</sup>                             |       | 77    | 1.21  | Brandenburg <sup>133,139,142,178-181,183,185,189,191,194</sup>  |        | 260   | 0.39  | Anatum <sup>150,198</sup>           |       | 12  | 0.16  |
| Enteritidis <sup>79,92-94,98,103,110</sup>                       |       | 35    | 0.55  | Livingstone <sup>*</sup>                                        |        | 207   | 0.31  | Infantis <sup>150,198</sup>         |       | 11  | 0.15  |
| Infantis <sup>79,84,170,172</sup>                                |       | 29    | 0.46  | London <sup>**</sup>                                            |        | 156   | 0.23  | Heidelberg <sup>150,198</sup>       |       | 9   | 0.12  |
| Agona <sup>80,83,94,169-172,174</sup>                            |       | 28    | 0.44  | Bredeney <sup>139-141,177,182,185,187,189,191,192,194-196</sup> |        | 145   | 0.22  | Johannesburg <sup>150,198</sup>     |       | 7   | 0.10  |
| Corvallis <sup>100,105,110</sup>                                 |       | 24    | 0.38  | Goldcoast <sup>141,142,179,185,191,194,197</sup>                |        | 114   | 0.17  | Rissen <sup>150</sup>               |       | 7   | 0.10  |
| Others <sup>‡</sup>                                              |       | 334   | 5.26  | Others <sup>132,133,139-143,147,176-197</sup>                   |        | 301   | 0.45  | Others <sup>150,198,199</sup>       |       | 86  | 1.16  |

TS: total samples; PS: positive samples; PR: percentage ratio;

\*83,84,87,92-94,98,103,105,110,121,128,169,170,172,174,175; †80,83,84,100,105,110,112,119-122,128,169,171-173,175; ‡79,80,83,84,87,93,98,100,103,105,110,112,119-122,128,169-175; •139,141,142,177-179,182,183,188,192,194,196; \*\*139-142,178-180,185,186,188,189,191,192,194,197

**TABLE S8 Reported Serovars - Beef**

| Continent                                                       | TS        | PS        | PR        | Continent                                      | TS        | PS        | PR        | Continent                                                | TS        | PS        | PR        |
|-----------------------------------------------------------------|-----------|-----------|-----------|------------------------------------------------|-----------|-----------|-----------|----------------------------------------------------------|-----------|-----------|-----------|
| Latin America                                                   | 4,445     | 1,668     | 37.53     | North America                                  | 12,217    | 2,444     | 20        | Africa                                                   | 12,921    | 1,459     | 11.29     |
| <b>Serotypes</b>                                                |           | <b>PS</b> | <b>PR</b> | <b>Serotypes</b>                               |           | <b>PS</b> | <b>PR</b> | <b>Serotypes</b>                                         |           | <b>PS</b> | <b>PR</b> |
| Anatum <sup>6,153,200-205</sup>                                 |           | 240       | 5.40      | Montevideo <sup>27,30,209-214</sup>            |           | 688       | 5.63      | Typhimurium <sup>46,51,52,65,69,70,74,217-223</sup>      |           | 177       | 1.37      |
| Typhimurium <sup>153,202-204,206,207</sup>                      |           | 154       | 3.46      | Anatum <sup>27,30,209-212</sup>                |           | 657       | 5.38      | Enteritidis <sup>51,65,70,217,218,221,224</sup>          |           | 122       | 0.94      |
| Meleagridis <sup>6,153,205</sup>                                |           | 140       | 3.15      | Mbandaka <sup>30,210-212,214</sup>             |           | 233       | 1.91      | Anatum <sup>46,65,69,70,76,217-221,224-226</sup>         |           | 120       | 0.93      |
| Agona <sup>6,153,202,203</sup>                                  |           | 93        | 2.09      | Kentucky <sup>29,30,210-213</sup>              |           | 216       | 1.77      | Dublin <sup>65,69,168,220,222,227-230</sup>              |           | 106       | 0.82      |
| Sinstorf <sup>202-204</sup>                                     |           | 58        | 1.30      | Cerro <sup>209-213,215,216</sup>               |           | 169       | 1.38      | Bredeney <sup>70,218-220,230,231</sup>                   |           | 96        | 0.74      |
| Monophasic <sup>202</sup>                                       |           | 56        | 1.26      | Typhimurium <sup>27,29,30,211-216</sup>        |           | 162       | 1.33      | Saintpaul <sup>46,65,69,168,220,222,227,228</sup>        |           | 47        | 0.36      |
| Infantis <sup>153,201-204,208</sup>                             |           | 50        | 1.12      | Muenster <sup>30,205,209,210,212-214,216</sup> |           | 130       | 1.06      | Infantis <sup>51,69,70,168,218,221,223</sup>             |           | 44        | 0.34      |
| Give <sup>202-205,208</sup>                                     |           | 37        | 0.83      | Reading <sup>30,205,210,212</sup>              |           | 96        | 0.79      | Muenster <sup>217,230,231</sup>                          |           | 42        | 0.33      |
| Derby <sup>153,200,202,203,208</sup>                            |           | 32        | 0.74      | Meleagridis <sup>28,30,205,210,212,213</sup>   |           | 90        | 0.74      | Newport <sup>69,74,218,222,225,230-232</sup>             |           | 36        | 0.28      |
| Kentucky <sup>203,205</sup>                                     |           | 30        | 0.67      | Agona <sup>28,210,212</sup>                    |           | 44        | 0.36      | Kentucky <sup>69,220,221,223</sup>                       |           | 36        | 0.28      |
| Panama <sup>201-204,207</sup>                                   |           | 30        | 0.67      | Muenchen <sup>210-212</sup>                    |           | 32        | 0.26      | Haifa <sup>217,222,223</sup>                             |           | 35        | 0.27      |
| Others <sup>6,154,200-208</sup>                                 |           | 733       | 16.49     | Others <sup>27-30,209-216</sup>                |           | 65        | 0.53      | Others <sup>46,48,51,52,65,69,70,74,76,168,217-233</sup> |           | 641       | 4.96      |
| <b>Continent</b>                                                | <b>TS</b> | <b>PS</b> | <b>PR</b> | <b>Continent</b>                               | <b>TS</b> | <b>PS</b> | <b>PR</b> | <b>Continent</b>                                         | <b>TS</b> | <b>PS</b> | <b>PR</b> |
| Asia                                                            | 1,862     | 369       | 19.82     | Europe                                         | 61,595    | 725       | 1.18      | Oceania                                                  | 3,946     | 214       | 5.42      |
| <b>Serotypes</b>                                                |           | <b>PS</b> | <b>PR</b> | <b>Serotypes</b>                               |           | <b>PS</b> | <b>PR</b> | <b>Serotypes</b>                                         |           | <b>PS</b> | <b>PR</b> |
| Agona <sup>80,87,234</sup>                                      |           | 46        | 2.47      | Typhimurium <sup>139-143,176,184,235,236</sup> |           | 211       | 0.34      | Muenchen <sup>238,239</sup>                              |           | 56        | 1.42      |
| Weltevreden <sup>81,84,105,119,120</sup>                        |           | 41        | 2.20      | Derby <sup>139-143,176,237</sup>               |           | 95        | 0.15      | Senftenberg <sup>238,239</sup>                           |           | 21        | 0.53      |
| Anatum <sup>80,84,104,105,120,127</sup>                         |           | 34        | 1.83      | Dublin <sup>139,141,235-237</sup>              |           | 51        | 0.08      | Zanzibar <sup>238,240</sup>                              |           | 19        | 0.48      |
| Rissen <sup>84,105,120</sup>                                    |           | 31        | 1.66      | Brandenburg <sup>142</sup>                     |           | 38        | 0.06      | Give <sup>238,239</sup>                                  |           | 17        | 0.43      |
| Derby <sup>80,83,84,92,105,119,120,173,234</sup>                |           | 26        | 1.40      | Monophasic <sup>139</sup>                      |           | 30        | 0.05      | Bredeney <sup>238</sup>                                  |           | 15        | 0.38      |
| Thompson <sup>96,127</sup>                                      |           | 19        | 1.02      | Rissen <sup>139</sup>                          |           | 24        | 0.04      | Typhimurium <sup>239,241</sup>                           |           | 15        | 0.38      |
| Typhimurium <sup>81,83,84,104,105,127</sup>                     |           | 18        | 0.97      | Mbandaka <sup>141,237</sup>                    |           | 19        | 0.03      | Anatum <sup>238,240</sup>                                |           | 13        | 0.33      |
| Senftenberg <sup>80,234</sup>                                   |           | 17        | 0.91      | Enteritidis <sup>133,139,142,235</sup>         |           | 20        | 0.03      | Virchow <sup>238,241</sup>                               |           | 13        | 0.33      |
| London <sup>84,92,105,119</sup>                                 |           | 16        | 0.86      | Anatum <sup>139,140,142,237</sup>              |           | 15        | 0.02      | Mbandaka <sup>238</sup>                                  |           | 12        | 0.30      |
| Enteritidis <sup>80,81,83,92,104,127</sup>                      |           | 15        | 0.81      | Infantis <sup>142,184,237</sup>                |           | 15        | 0.02      | Orion <sup>238-240</sup>                                 |           | 10        | 0.25      |
| Meleagridis <sup>127,234</sup>                                  |           | 12        | 0.64      | Kentucky <sup>139,141</sup>                    |           | 14        | 0.02      | Kottbus <sup>238</sup>                                   |           | 5         | 0.13      |
| Others <sup>80,81,83,84,90,92,103-105,113,119,127,173,234</sup> |           | 138       | 7.41      | Others <sup>133,139-143,176,184,235-237</sup>  |           | 135       | 0.22      | Others <sup>238-241</sup>                                |           | 15        | 0.38      |

TS: total samples; PS: positive samples; PR: percentage ratio.

**TABLE S9 Reported Serovars - Seafood**

| Continent                                        | TS    | PS    | PR    | Continent                          | TS     | PS  | PR   | Continent                             | TS    | PS  | PR   |
|--------------------------------------------------|-------|-------|-------|------------------------------------|--------|-----|------|---------------------------------------|-------|-----|------|
| Latin America                                    | 642   | 266   | 41.43 | North America                      | 11,625 | 388 | 3.34 | Africa                                | 1,463 | 143 | 9.77 |
| Serotypes                                        |       | PS    | PR    | Serotypes                          |        | PS  | PR   | Serotypes                             |       | PS  | PR   |
| Hadar <sup>242</sup>                             |       | 20    | 3.12  | Newport <sup>246-249</sup>         |        | 93  | 0.80 | Hadar <sup>70,252</sup>               |       | 23  | 1.57 |
| Heidelberg <sup>242</sup>                        |       | 7     | 1.09  | Weltevreden <sup>246,248,250</sup> |        | 15  | 0.13 | Blockley <sup>70,253</sup>            |       | 17  | 1.16 |
| Infantis <sup>243,244</sup>                      |       | 7     | 1.09  | Mbandaka <sup>246,248</sup>        |        | 13  | 0.11 | Enteritidis <sup>64</sup>             |       | 17  | 1.16 |
| Madelia <sup>243,244</sup>                       |       | 7     | 1.09  | Muenchen <sup>246,251</sup>        |        | 13  | 0.11 | Kentucky <sup>253,254</sup>           |       | 17  | 1.16 |
| Brandenburg <sup>242,244</sup>                   |       | 6     | 0.93  | Paratyphi B <sup>249,250</sup>     |        | 12  | 0.10 | Bredeney <sup>254</sup>               |       | 6   | 0.41 |
| Panama <sup>242,243</sup>                        |       | 6     | 0.93  | Arizona <sup>249</sup>             |        | 10  | 0.09 | Muenster <sup>255</sup>               |       | 6   | 0.41 |
| Saintpaul <sup>242-244</sup>                     |       | 6     | 0.93  | Braenderup <sup>246,247,251</sup>  |        | 10  | 0.09 | Typhimurium <sup>64,70,254</sup>      |       | 6   | 0.41 |
| Braenderup <sup>243</sup>                        |       | 5     | 0.78  | Senftenberg <sup>247,248,250</sup> |        | 10  | 0.09 | Agona <sup>254</sup>                  |       | 3   | 0.21 |
| Mbandaka <sup>244</sup>                          |       | 4     | 0.62  | Tallahassee <sup>251</sup>         |        | 9   | 0.08 | Derby <sup>254</sup>                  |       | 3   | 0.21 |
| Agona <sup>244</sup>                             |       | 2     | 0.31  | Agona <sup>249,251</sup>           |        | 8   | 0.07 | Drac <sup>254</sup>                   |       | 3   | 0.21 |
| Anatum <sup>244</sup>                            |       | 2     | 0.31  | Typhimurium <sup>247-249</sup>     |        | 8   | 0.07 | Typhi <sup>64</sup>                   |       | 3   | 0.21 |
| Others <sup>23,242-245</sup>                     |       | 33    | 5.14  | Others <sup>246-251</sup>          |        | 110 | 0.95 | Others <sup>64,69,70,73,252-254</sup> |       | 43  | 2.94 |
| Continent                                        | TS    | PS    | PR    | Continent                          | TS     | PS  | PR   | Continent                             | TS    | PS  | PR   |
| Asia                                             | 5,552 | 2,230 | 40.17 | Europe                             | 9,620  | 465 | 4.83 | Oceania                               | -     | -   | -    |
| Serotypes                                        |       | PS    | PR    | Serotypes                          |        | PS  | PR   | Serotypes                             |       | PS  | PR   |
| Weltevreden <sup>105,115,119,123,255-257</sup>   |       | 494   | 8.90  | Typhimurium <sup>262-265</sup>     |        | 99  | 1.03 | -                                     |       | -   | -    |
| Typhimurium <sup>105,115,131,255-260</sup>       |       | 94    | 1.69  | Senftenberg <sup>262-264</sup>     |        | 84  | 0.87 | -                                     |       | -   | -    |
| Enteritidis <sup>105,115,123,256,257,260</sup>   |       | 81    | 1.46  | Monophasic <sup>262</sup>          |        | 28  | 0.29 | -                                     |       | -   | -    |
| Derby <sup>105,115,119,123,255,257</sup>         |       | 65    | 1.17  | Newport <sup>262,265,266</sup>     |        | 25  | 0.26 | -                                     |       | -   | -    |
| Senftenberg <sup>115,123,256</sup>               |       | 62    | 1.12  | Agona <sup>262-265</sup>           |        | 24  | 0.25 | -                                     |       | -   | -    |
| Stanley <sup>105,123,256-259</sup>               |       | 52    | 0.94  | Derby <sup>262-265</sup>           |        | 21  | 0.22 | -                                     |       | -   | -    |
| Lexington <sup>105,115,119</sup>                 |       | 51    | 0.92  | Enteritidis <sup>262-265</sup>     |        | 11  | 0.11 | -                                     |       | -   | -    |
| Bareilly <sup>105,255-257</sup>                  |       | 46    | 0.83  | Saintpaul <sup>262, 266</sup>      |        | 11  | 0.11 | -                                     |       | -   | -    |
| Rissen <sup>105,115,257</sup>                    |       | 43    | 0.77  | Thompson <sup>263</sup>            |        | 11  | 0.11 | -                                     |       | -   | -    |
| Anatum <sup>105,115,255</sup>                    |       | 42    | 0.76  | Paratyphi B <sup>262-264</sup>     |        | 10  | 0.10 | -                                     |       | -   | -    |
| Aberdeen <sup>105,258</sup>                      |       | 41    | 0.74  | Bredeney <sup>262,264,265</sup>    |        | 7   | 0.07 | -                                     |       | -   | -    |
| Others <sup>80,105,115,119,123,131,255-261</sup> |       | 1,295 | 23.32 | Others <sup>262-266</sup>          |        | 131 | 1.36 | -                                     |       | -   | -    |

TS: total samples; PS: positive samples; PR: percentage ratio.

**REFERENCES**

1. Minharro S, Nascimento CA, Galletti JP, Merisse TJ, Feitosa ACF, Santos HD, Dias FEF, Santana ES, Baldani CD, Andrade MA. 2015. Antimicrobial susceptibility of *Salmonella* serovars isolated from edible offal and carcasses of slaughtered poultry in the state of Tocantins, Brazil. *Semina* 36:2661-2669.
2. Donado-Godoy P, Clavijo V, León M, Arevalo A, Castellanos R, Bernal J, Tafur MA, Ovalle MV, Alali WQ, Hume M, Romero-Zuñiga JJ, Walls I, Doyle MP. 2014. Counts, serovars, and antimicrobial resistance phenotypes of *Salmonella* on raw chicken meat at retail in Colombia. *J Food Prot* 77:227–235.
3. Favier GI, Lucero Estrada CSM, Lazarte Otero V, Escudero ME. 2013. Prevalence, antimicrobial susceptibility, and molecular characterization by PCR and Pulsed Field Gel Electrophoresis (PFGE) of *Salmonella* spp. isolated from foods of animal origin in San Luis, Argentina. *Food Control* 29:49–54.
4. Oliveira WF, Cardoso WM, Salles RPR, Romão JM, Teixeira RSC, Câmara SR, Siqueira AA, Marques LCL. 2006. Initial identification and sensitivity to antimicrobial agents of *Salmonella* sp. isolated from poultry products in the state of Ceara, Brazil. *Rev Bras Cienc Avic* 8:193–199.
5. Tavechio AT, Ghilardi ÂCR, Peresi JTM, Fuzihara TO, Yonamine EK, Jakabi M, Fernandes SA. 2002. *Salmonella* serotypes isolated from nonhuman sources in São Paulo, Brazil, from 1996 through 2000. *J Food Prot* 65:1041–1044.
6. Zaidi MB, Calva JJ, Estrada-Garcia MT, Leon V, Vazquez G, Figueroa G, Lopez E, Contreras J, Abbott J, Zhao S, McDermott P, Tollefson L. 2008. Integrated food chain surveillance system for *Salmonella* spp. in Mexico. *Emerg Infect Dis* 14:429–435.
7. Zaidi MB, McDermott PF, Fedorka-Cray P, Leon V, Canche C, Hubert SK, Abbott J, León M, Zhao S, Headrick M, Tollefson L. 2006. Nontyphoidal *Salmonella* from human clinical cases,



- asymptomatic children, and raw retail meats in Yucatan, Mexico. *Clin Infect Dis* 42:21–28.
8. Medeiros MAN, Oliveira DCN de, Rodrigues D dos P, Freitas DRC de. 2011. Prevalence and antimicrobial resistance of *Salmonella* in chicken carcasses at retail in 15 Brazilian cities. *Rev Panam Salud Publica* 30:555–560.
  9. Duarte DAM, Ribeiro AR, Vasconcelos AMM, Santos SB, Silva JVD, Andrade PLA de, Falcão LSP da C de A. 2009. Occurrence of *Salmonella* spp. in broiler chicken carcasses and their susceptibility to antimicrobial agents. *Braz J Microbiol* 40:569–573.
  10. Ribeiro AR, Kellermann A, Santos LR dos, Bessa MC, Nascimento VP do. 2007. *Salmonella* spp. in raw broiler parts: occurrence, antimicrobial resistance profile and phage typing of the *Salmonella* Enteritidis isolates. *Braz J Microbiol* 38:296–299.
  11. Fuzihara TO, Fernandes SA, Franco BDGM. 2000. Prevalence and dissemination of *Salmonella* serotypes along the slaughtering process in Brazilian small poultry slaughterhouses. *J Food Prot* 63:1749–1753.
  12. Vinueza-Burgos C, Cevallos M, Ron-Garrido L, Bertrand S, De Zutter L. 2016. Prevalence and diversity of *Salmonella* serotypes in Ecuadorian broilers at slaughter age. *PLoS One* 11:1-12.
  13. Pulido-Landínez M, Sánchez-Ingunza R, Guard J, Nascimento VP do. 2013. Assignment of serotype to *Salmonella enterica* isolates obtained from poultry and their environment in southern Brazil. *Lett Appl Microbiol* 57:288-294.
  14. Palmeira A, Santos LR dos, Borsoi A, Rodrigues LB, Calasans M, Nascimento VP do. 2016. Serovars and antimicrobial resistance of *Salmonella* spp. isolated from turkey and broiler carcasses in Southern Brazil between 2004 and 2006. *Rev Inst Med Trop Sao Paulo* 58:1-5.
  15. Yamatogi RS, Oliveira HC, Possebon FS, Pantoja JCF, Joaquim JGF, Pinto JPAN, Araújo JP. 2016. Qualitative and quantitative determination and resistance patterns of *Salmonella* from

- poultry carcasses. *J Food Prot* 79:950–955.
16. Boscán-Duque LA, Arzálluz-Fisher AM, Ugarte C, Sánchez D, Wittum TE, Hoet AE. 2007. Reduced susceptibility to quinolones among *Salmonella* serotypes isolated from poultry at slaughter in Venezuela. *J Food Prot* 70:2030–2035.
  17. Rodriguez JM, Rondón IS, Verjan N, Rodriguez JM, Rondón IS, Verjan N. 2015. Serotypes of *Salmonella* in broiler carcasses marketed at Ibagué, Colombia. *Rev Bras Cienc Avic* 17:545–552.
  18. Jarquin C, Alvarez D, Morales O, Morales AJ, López B, Donado P, Valencia MF, Arévalo A, Muñoz F, Walls I, Doyle MP, Alali WQ. 2015. *Salmonella* on raw poultry in retail markets in Guatemala: levels, antibiotic susceptibility, and serovar distribution. *J Food Prot* 78:1642–1650.
  19. Donado-Godoy P, Clavijo V, León M, Tafur MA, Gonzales S, Hume M, Alali W, Walls I, Lo Fo Wong DMA, Doyle MP. 2012. Prevalence of *Salmonella* on retail broiler chicken meat carcasses in Colombia. *J Food Prot* 75:1134–1138.
  20. Panzenhagen PHN, Aguiar WS, da Silva Frasso B, de Almeida Pereira VL, da Costa Abreu DL, dos Prazeres Rodrigues D, do Nascimento ER, de Aquino MHC. 2016. Prevalence and fluoroquinolones resistance of *Campylobacter* and *Salmonella* isolates from poultry carcasses in Rio de Janeiro, Brazil. *Food Control* 61:243–247.
  21. Cunha-Neto A da, Carvalho LA, Carvalho RCT, dos Prazeres Rodrigues D, Mano SB, Figueiredo EE de S, Conte-Junior CA. 2018. *Salmonella* isolated from chicken carcasses from a slaughterhouse in the state of Mato Grosso, Brazil: antibiotic resistance profile, serotyping, and characterization by repetitive sequence-based PCR system. *Poult Sci* 97:1373–1381.
  22. Khan AS, Georges K, Rahaman S, Abdela W, Adesiyun AA. 2018. Prevalence and serotypes of *Salmonella* spp. on chickens sold at retail outlets in Trinidad. *PLoS One* 13:1–17.

23. Ristori CA, Rowlands REG, Martins CG, Barbosa ML, dos Santos LF, Jakabi M, de Melo Franco BDG. 2017. Assessment of consumer exposure to *Salmonella* spp., *Campylobacter* spp., and Shiga Toxin–Producing *Escherichia coli* in meat products at retail in the city of Sao Paulo, Brazil. *Foodborne Pathog Dis* 14:447–453.
24. Lestari SI, Han F, Wang F, Ge B. 2009. Prevalence and antimicrobial resistance of *Salmonella* serovars in conventional and organic chickens from Louisiana retail stores. *J Food Prot* 72:1165–1172.
25. Bucher O, Holley RA, Ahmed R, Tabor H, Nadon C, Ng LK, D’Aoust J-Y. 2007. Occurrence and characterization of *Salmonella* from chicken nuggets, strips, and pelleted broiler feed. *J Food Prot* 70:2251–2258.
26. Rothrock MJ, Ingram KD, Gamble J, Guard J, Cicconi-Hogan KM, Hinton A, Hiatt KL. 2015. The characterization of *Salmonella enterica* serotypes isolated from the scalding tank water of a commercial poultry processing plant: Recovery of a multidrug-resistant Heidelberg strain. *Poult Sci* 94:467–472.
27. Retail Meat Interim Report. FDA Food and Drug Administration. 2016. Retrieved 17 July 2018. <https://www.fda.gov/downloads/AnimalVeterinary/SafetyHealth/AntimicrobialResistance/NationalAntimicrobialResistanceMonitoringSystem/UCM498134.pdf>
28. White DG, Zhao S, Sudler R, Ayers S, Friedman S, Chen S, McDermott PF, McDermott S, Wagner DD, Meng J. 2001. The isolation of antibiotic-resistant *Salmonella* from retail ground meats. *N Engl J Med* 345:1147–1154.
29. Sarwari AR, Magder LS, Levine P, McNamara AM, Knower S, Armstrong GL, Etzel R, Hollingsworth J, Morris JG. 2001. Serotype Distribution of *Salmonella* isolates from food animals after slaughter differs from that of isolates found in humans. *J Infect Dis* 183:1295–1299.

30. Schlosser W, Hogue A, Ebel E, Rose B, Umholtz R, Ferris K, James W. 2000. Analysis of *Salmonella* serotypes from selected carcasses and raw ground products sampled prior to implementation of the Pathogen Reduction; Hazard Analysis and Critical Control Point Final Rule in the US. *Int J Food Microbiol* 58:107–111.
31. Berrang ME, Bailey JS, Altekruze SF, Shaw WK, Patel BL, Meinersmann RJ, Fedorka-Cray PJ. 2009. Prevalence, serotype, and antimicrobial resistance of *Salmonella* on broiler carcasses postpick and postchill in 20 U.S. Processing Plants. *J Food Prot* 72:1610–1615.
32. M'ikanatha NM, Sandt CH, Localio AR, Tewari D, Rankin SC, Whichard JM, Altekruze SF, Lautenbach E, Folster JP, Russo A, Chiller TM, Reynolds SM, McDermott PF. 2010. Multidrug-resistant *Salmonella* isolates from retail chicken meat compared with human clinical isolates. *Foodborne Pathog Dis* 7:929–934.
33. Aslam M, Checkley S, Avery B, Chalmers G, Bohaychuk V, Gensler G, Reid-Smith R, Boerlin P. 2012. Phenotypic and genetic characterization of antimicrobial resistance in *Salmonella* serovars isolated from retail meats in Alberta, Canada. *Food Microbiol* 32:110–117.
34. Cui S, Ge B, Zheng J, Meng J. 2005. Prevalence and antimicrobial resistance of *Campylobacter* spp. and *Salmonella* serovars in organic chickens from Maryland retail stores. *Appl Environ Microbiol* 71:4108–4111.
35. Mazengia E, Samadpour M, Hill HW, Greeson K, Tenney K, Liao G, Huang X, Meschke JS. 2014. Prevalence, concentrations, and antibiotic sensitivities of *Salmonella* serovars in poultry from retail establishments in Seattle, Washington. *J Food Prot* 77:885–893.
36. Kegode RB, Doetkott DK, Khaita ML, Wesley IV. 2008. Occurrence of *Campylobacter* species *Salmonella* species and generic *Escherichia coli* in meat products from retail outlets in the Fargo metropolitan area. *J Food Saf* 28:111–125.
37. Parveen S, Taabodi M, Schwarz JG, Oscar TP, Harter-Dennis J, White DG. 2007. Prevalence

- and antimicrobial resistance of *Salmonella* recovered from processed poultry. *J Food Prot* 70:2466–2472.
38. Ravel A, Smolina E, Sargeant JM, Cook A, Marshall B, Fleury MD, Pollari F. 2010. Seasonality in human Salmonellosis: assessment of human activities and chicken contamination as driving factors. *Foodborne Pathog Dis* 7:785–794.
  39. Cook A, Reid-Smith R, Irwin R, McEWEN SA, Valdivieso-Garcia A, Ribble C. 2009. Antimicrobial resistance in *Campylobacter*, *Salmonella*, and *Escherichia coli* isolated from retail turkey meat from Southern Ontario, Canada. *J Food Prot* 72:473–481.
  40. Khaita ML, Kegode RB, Doetkott DK. 2007. Occurrence of antimicrobial-resistant *Salmonella* species in raw and ready to eat turkey meat products from retail outlets in the Midwestern United States. *Foodborne Pathog Dis* 4:517–525.
  41. Fakhr MK, Sherwood JS, Thorsness J, Logue CM. 2006. Molecular characterization and antibiotic resistance profiling of *Salmonella* isolated from retail turkey meat products. *Foodborne Pathog Dis* 3:366–374.
  42. Nayak R, Stewart-King T. 2008. Molecular epidemiological analysis and microbial source tracking of *Salmonella enterica* serovars in a preharvest turkey production environment. *Foodborne Pathog Dis* 5:115–126.
  43. Anderson PN, Hume ME, Byrd JA, Hernandez C, Stevens SM, Stringfellow K, Caldwell DJ. 2010. Molecular analysis of *Salmonella* serotypes at different stages of commercial turkey processing. *Poult Sci* 89:2030–2037.
  44. Gad AH, Abo-Shama UH, Harclerode KK, Fakhr MK. 2018. Prevalence, serotyping, molecular typing, and antimicrobial resistance of *Salmonella* isolated from conventional and organic retail ground poultry. *Front Microbiol* 9:1-10.

45. United States Department of Agriculture. Serotypes profile of *Salmonella* Isolates from meat and poultry products 1998-2014. Food Safety and Inspection Service 1-123.
46. Samaxa RG, Matsheka MI, Mpoloka SW, Gashe BA. 2012. Prevalence and antimicrobial susceptibility of *Salmonella* isolated from a variety of raw meat sausages in Gaborone (Botswana) retail stores. *J Food Prot* 75:637–642.
47. Amajoud N, Bouchrif B, Maadoudi ME, Senhaji NS, Karraouan B, Harsal AE, Abrini JE. 2017. Prevalence, serotype distribution, and antimicrobial resistance of *Salmonella* isolated from food products in Morocco. *J Infect Dev Ctries* 2017 11:136–142.
48. Raufu I, Bortolaia V, Svendsen CA, Ameh JA, Ambali AG, Aarestrup FM, Hendriksen RS. 2013. The first attempt of an active integrated laboratory-based *Salmonella* surveillance program in the north-eastern region of Nigeria. *J Appl Microbiol* 115:1059–1067.
49. Wouafo M, Nzouankeu A, Kinfack JA, Fonkoua M-C, Ejenguele G, Njine T, Ngandjio A. 2010. Prevalence and antimicrobial resistance of *Salmonella* serotypes in chickens from retail markets in Yaounde (Cameroon). *Microb Drug Resist* 16:171–176.
50. Cardinale E, Perrier Gros-Claude JD, Tall F, Guèye EF, Salvat G. 2005. Risk factors for contamination of ready-to-eat street-vended poultry dishes in Dakar, Senegal. *Int J Food Microbiol* 103:157–165.
51. Ahmed AM, Shimamoto T. 2014. Isolation and molecular characterization of *Salmonella enterica*, *Escherichia coli* O157:H7 and *Shigella* spp. from meat and dairy products in Egypt. *Int J Food Microbiol* 168–169:57–62.
52. Orji MU, Onuigbo HC, Mbata TI. 2005. Isolation of *Salmonella* from poultry droppings and other environmental sources in Awka, Nigeria. *Int J Infect Dis* 9:86–89.
53. Hang'ombe BM, Sharma RN, Skjerve E, Tuchili LM. 1999. Occurrence of *Salmonella*

- Enteritidis in pooled table eggs and market-ready chicken carcasses in Zambia. *Avian Dis* 43:597-599.
54. Saad S, Nada S, Sattar A. 2015. Incidence of *Salmonella* species in chicken cut-up carcasses and chicken products. *Benha Vet Med J* 29:29-35.
  55. Abd-Elghany SM, Sallam KI, Abd-Elkhalek A, Tamura T. 2015. Occurrence, genetic characterization and antimicrobial resistance of *Salmonella* isolated from chicken meat and giblets. *Epidemiol Infect* 143:997–1003.
  56. El Rahman H. 2015. Detection of molecular characterization of *Salmonella enterica* isolated from chicken meat and its products by using multiplex PCR. *Alex J Vet Sci* 46:155-160.
  57. Bada-Alambedji R, Fofana A, Seydi M, Akakpo AJ. 2006. Antimicrobial resistance of *Salmonella* isolated from poultry carcasses in Dakar (Senegal). *Braz J Microbiol* 37:510–515.
  58. Gritli A, Daboussi T, Moussa MB, Abassi MS. 2015. Prevalence and characterization of *Salmonella* in chicken consumed in military cantinas. *JS-INAT* 12:908-914.
  59. Hassan A-RHA, Salam HSH, Abdel-Latef GK. 2016. Serological identification and antimicrobial resistance of *Salmonella* isolates from broiler carcasses and human stools in Beni-Suef, Egypt. *BJBAS* 5:202–207.
  60. Karou GT, Ouattara H, Bakayoko S. 2013. Prevalence of *Salmonella* and distribution of serovars isolated from retail raw chicken gizzards in Abidjan. *Octa J Biosci* 2:115-121.
  61. Mezali L, Hamdi TM. 2012. Prevalence and antimicrobial resistance of *Salmonella* isolated from meat and meat products in Algiers (Algeria). *Foodborne Pathog Dis* 9:522–529.
  62. Rene KA, Adjehi D, Tago K, Marcelin DK, Ignace-Herve ME. 2014. Serotypes and antibiotic resistance of *Salmonella* spp. isolated from poultry carcass and raw gizzard sold in markets and catering in Abidjan. *Int J Curr Microbiol App Sci* 6:764-772.

63. Olobatoke RY, Mulugeta SD. 2015. Incidence of non-typhoidal *Salmonella* in poultry products in the North West Province, South Africa. *S Afr J Sci* 111:1–7.
64. Faleke OO, Jolayemi KO, Igoh YO, Jibril AH, Ayedun JO. 2017. *Salmonella* species on meat contact surfaces and processing water in Sokoto main market and abattoir, Nigeria. *Mac Vet Rev* 40:59–65.
65. Molla B, Alemayehu D, Salah W. 2003. Sources and distribution of *Salmonella* serotypes isolated from food animals, slaughterhouse personnel and retail meat products in Ethiopia: 1997-2002. *Ethiop J Health Dev* 17:63-70.
66. Molla B, Mesfin A. 2003. A survey of *Salmonella* contamination in chicken carcass and giblets in Central Ethiopia. *Revue Méd Vét* 4:267-270.
67. Cardinale E, Gros-Claude JDP, Rivoal K, Rose V, Tall F, Mead GC, Salvat G. 2005. Epidemiological analysis of *Salmonella enterica* ssp. *enterica* serovars Hadar, Brancaster and Enteritidis from humans and broiler chickens in Senegal using pulsed-field gel electrophoresis and antibiotic susceptibility. *J Appl Microbiol* 99:968–977.
68. Dione MM, Ieven M, Garin B, Marcotty T, Geerts S. 2009. Prevalence and antimicrobial resistance of *Salmonella* isolated from broiler farms, chicken carcasses, and street-vended restaurants in Casamance, Senegal. *J Food Prot* 72:2423–2427.
69. Zewdu E, Cornelius P. 2008. Antimicrobial resistance pattern of *Salmonella* serotypes isolated from food items and personnel in Addis Ababa, Ethiopia. *Trop Anim Health Prod* 41:241.
70. Bouchrif B, Paglietti B, Murgia M, Piana A, Cohen N, Ennaji MM, Rubino S, Timinouni M. 2009. Prevalence and antibiotic-resistance of *Salmonella* isolated from food in Morocco. *Infect Developing Countries* 3:35-40.
71. Cardinale E, Tall F, Cissé M, Guèye EF, Salvat G, Mead G. 2005. Risk factors associated with



- Salmonella enterica* subsp. *enterica* contamination of chicken carcasses in Senegal. Br Poult Sci 46:293–299.
72. Tibaijuka B, Molla B, Hildebrandt G, Kleer J. 2003. Occurrence of Salmonellae in retail raw chicken products in Ethiopia. Berl Munch Tierarztl Wochenschr 116:55–58.
73. El madiena MMAN, El Hussein AA, Muckle CA, Cole L, Wilkie E, Mistry K, Perets A. 2013. Antimicrobial susceptibility and multi-drug resistance of *Salmonella enterica* subspecies *enterica* serovars in Sudan. Trop Anim Health Prod 45:1113–1118.
74. Abbassi-Ghozzi I, Jaouani A, Hammami S, Martinez-Urtaza J, Boudabous A, Gtari M. 2012. Molecular analysis and antimicrobial resistance of *Salmonella* isolates recovered from raw meat marketed in the area of Grand Tunis, Tunisia. Pathologie Biologie 60:49–54.
75. Abdellah C, Fouzia RF, Abdelkader C, Bencheikh S, Mouloud Z. Prevalence and antimicrobial susceptibility of *Salmonella* isolates from chicken carcasses and giblets in Meknès, Morocco. Afr J Microbiol Res 3:215-219.
76. Smith S, Braun S, Akintimehin F, Fesobi T, Bamidele M, Coker A, Monecke S, Ehricht R. 2016. Serogenotyping and antimicrobial susceptibility testing of *Salmonella* spp. isolated from retail meat samples in Lagos, Nigeria. Mol Cell Probes 30:189–194.
77. Ammari S, Laglaoui A, En-nanei L, Bertrand S, Wildemauwe C, Barrijal S, Abid M. 2009. Isolation, drug resistance and molecular characterization of *Salmonella* isolates in northern Morocco. J Infect Developing Countries 3:41-49.
78. Yang B, Wang Q, Cui S, Wang Y, Shi C, Xia X, Xi M, Wang X, Shi X, Wang D, Zhang Z, Meng J. 2014. Characterization of extended-spectrum beta-lactamases-producing *Salmonella* strains isolated from retail foods in Shaanxi and Henan Province, China. Food Microbiol 42:14–18.

79. Yang B, Xi M, Wang X, Cui S, Yue T, Hao H, Wang Y, Cui Y, Alali WQ, Meng J, Walls I, Lo Fo Wong DM, Doyle MP. 2011. Prevalence of *Salmonella* on raw poultry at retail markets in China. *J Food Prot* 74:1724–1728.
80. Yu T, Jiang X, Zhou Q, Wu J, Wu Z. 2014. Antimicrobial resistance, class 1 Integrons, and horizontal transfer in *Salmonella* isolated from retail food in Henan, China. *J Infect Dev Ctries* 8:705-711.
81. Modarressi S, Thong KL. 2010. Isolation and molecular sub typing of *Salmonella enterica* from chicken, beef and street foods in Malaysia. *Sci Res Essays* 5:2713-2720.
82. Cui M, Xie M, Qu Z, Zhao S, Wang J, Wang Y, He T, Wang H, Zuo Z, Wu C. 2016. Prevalence and antimicrobial resistance of *Salmonella* isolated from an integrated broiler chicken supply chain in Qingdao, China. *Food Control* 62:270–276.
83. Yang B, Qu D, Zhang X, Shen J, Cui S, Shi Y, Xi M, Sheng M, Zhi S, Meng J. 2010. Prevalence and characterization of *Salmonella* serovars in retail meats of marketplace in Shaanxi, China. *Int J Food Microbiol* 141:63–72.
84. Thai TH, Hirai T, Lan NT, Yamaguchi R. 2012. Antibiotic resistance profiles of *Salmonella* serovars isolated from retail pork and chicken meat in North Vietnam. *Int J Food Microbiol* 156:147–151.
85. Mir IA, Kashyap SK, Maherchandani S. 2015. Isolation, serotype diversity and antibiogram of *Salmonella enterica* isolated from different species of poultry in India. *Asian Pac J Trop Biomed* 5:561–567.
86. Rusul G, Khair J, Radu S, Cheah CT, Yassin RM. 1996. Prevalence of *Salmonella* in broilers at retail outlets, processing plants and farms in Malaysia. *Int J Food Microbiol* 33:183–194.
87. Yang B, Qiao L, Zhang X, Cui Y, Xia X, Cui S, Wang X, Meng X, Ge W, Shi X, Wang D,

- Meng J. 2013. Serotyping, antimicrobial susceptibility, pulse field gel electrophoresis analysis of *Salmonella* isolates from retail foods in Henan Province, China. *Food Control* 32:228–235.
88. Yildirim Y, Gonulalan Z, Pamuk S, Ertas N. 2011. Incidence and antibiotic resistance of *Salmonella* spp. on raw chicken carcasses. *Food Res Int* 44:725–728.
89. Wang Y, Yang B, Cui Y, Alali WQ, Xia X, Xi M, Wang X, Shi X, Wang D, Meng J. 2015. Subtyping of *Salmonella* isolates on retail raw chicken in China by pulsed-field gel electrophoresis and plasmid analysis. *Food Control* 47:420–426.
90. Dallal MMS, Taremi M, Gachkar L, Sanaei M, Bakhtiari R, Yazdi MKS, Zali MR. 2009. Characterization of antibiotic resistant patterns of *Salmonella* serotypes isolated from beef and chicken samples in Tehran. *Jundishapur J Microbiol* 2:124- 131.
91. Soomro AH, Khaskheli M, Bhutto MB, Shah G, Memon A, Dewani P. 2010. Prevalence and antimicrobial resistance of *Salmonella* serovars isolated from poultry meat in Hyderabad, Pakistan. *Turk J Vet Anim Sci* 34:455–460.
92. Yin M, Yang B, Wu Y, Wang L, Wu H, Zhang T, Tuohetaribayi G. 2016. Prevalence and characterization of *Salmonella enterica* serovar in retail meats in market place in Uighur, Xinjiang, China. *Food Control* 64:165–172.
93. Lin D, Yan M, Lin S, Chen S. 2014. Increasing prevalence of hydrogen sulfide negative *Salmonella* in retail meats. *Food Microbiol* 43:1–4.
94. Bai L, Lan R, Zhang X, Cui S, Xu J, Guo Y, Li F, Zhang D. 2015. Prevalence of *Salmonella* isolates from chicken and pig slaughterhouses and emergence of ciprofloxacin and cefotaxime co-resistant *S. enterica* serovar Indiana in Henan, China. *Plos One* 10:1-14
95. Chon J-W, Jung H-I, Kuk M, Kim Y-J, Seo K-H, Kim S-K. 2015. High occurrence of extended-spectrum  $\beta$ -lactamase-producing *Salmonella* in broiler carcasses from poultry slaughterhouses in

- South Korea. *Foodborne Pathog Dis* 12:190–196.
96. Dallal MMS, Doyle MP, Rezadehbashi M, Dabiri H, Sanaei M, Modarresi S, Bakhtiari R, Sharifiy K, Taremi M, Zali MR, Sharifi-Yazdi MK. 2010. Prevalence and antimicrobial resistance profiles of *Salmonella* serotypes, *Campylobacter* and *Yersinia* spp. isolated from retail chicken and beef, Tehran, Iran. *Food Control* 21:388–392.
  97. Kidie DH, Bae DH, Lee YJ. Prevalence and antimicrobial resistance of *Salmonella* isolated from poultry slaughterhouses in Korea. *Jpn J Vet Res* 61:129-136.
  98. Lai J, Wu C, Wu C, Qi J, Wang Y, Wang H, Liu Y, Shen J. 2014. Serotype distribution and antibiotic resistance of *Salmonella* in food-producing animals in Shandong province of China, 2009 and 2012. *Int J Food Microbiol* 180:30–38.
  99. Lu Y, Wu C-M, Wu G-J, Zhao H-Y, He T, Cao X-Y, Dai L, Xia L-N, Qin S-S, Shen J-Z. 2011. Prevalence of antimicrobial resistance among *Salmonella* isolates from chicken in China. *Foodborne Pathog Dis* 8:45–53.
  100. Sinwat N, Angkittitrakul S, Chuanchuen R. 2015. Characterization of antimicrobial resistance in *Salmonella enterica* isolated from pork, chicken meat, and humans in Northeastern Thailand. *Foodborne Pathog Dis* 12:759–765.
  101. Shah DH, Paul NC, Sischo WC, Crespo R, Guard J. 2017. Population dynamics and antimicrobial resistance of the most prevalent poultry-associated *Salmonella* serotypes. *Poult Sci* 96:687–702.
  102. Sodagari HR, Mashak Z, Ghadimianazar A. 2015. Prevalence and antimicrobial resistance of *Salmonella* serotypes isolated from retail chicken meat and giblets in Iran. *J Infect Dev Ctries* 9:463-469.
  103. Hyeon JY, Chon JW, Hwang IG, Kwak HS, Kim MS, Kim SK, Choi IS, Song CS, Park C, Seo

- KH. 2011. Prevalence, antibiotic resistance, and molecular characterization of *Salmonella* serovars in retail meat products. *J Food Prot* 74:161–166.
104. Shafini AB, Son R. 2017. Prevalence of *Salmonella* spp. in chicken and beef from retail outlets in Malaysia. *Int Food Res J* 24: 437-449.
105. Nguyen DTA, Kanki M, Nguyen PD, Le HT, Ngo PT, Tran DNM, Le NH, Dang CV, Kawai T, Kawahara R, Yonogi S, Hirai Y, Jinnai M, Yamasaki S, Kumeda Y, Yamamoto Y. 2016. Prevalence, antibiotic resistance, and extended-spectrum and AmpC  $\beta$ -lactamase productivity of *Salmonella* isolates from raw meat and seafood samples in Ho Chi Minh City, Vietnam. *Int J Food Microbiol* 236:115–122.
106. Kasimoglu Dogru A, Ayaz ND, Gencay YE. 2010. Serotype identification and antimicrobial resistance profiles of *Salmonella* spp. isolated from chicken carcasses. *Trop Anim Health Prod* 42:893–897.
107. Youn SY, Jeong OM, Choi BK, Jung SC, Kang MS. 2017. Comparison of the antimicrobial and sanitizer resistance of *Salmonella* isolates from chicken slaughter processes in Korea. *J Food Sci* 82:711–717.
108. Park H-J, Chon J-W, Lim J-S, Seo K-H, Kim Y-J, Heo E-J, Wee S-H, Sung K, Moon J-S. 2015. Prevalence analysis and molecular characterization of *Salmonella* at different processing steps in broiler slaughter plants in South Korea. *J Food Sci* 80:2822–2826.
109. Ta YT, Nguyen TT, To PB, Pham DX, Le HTH, Thi GN, Alali WQ, Walls I, Doyle MP. 2014. Quantification, serovars, and antibiotic resistance of *Salmonella* isolated from retail raw chicken meat in Vietnam. *J Food Prot* 77:57–66.
110. Trongjit S, Angkititrakul S, Tuttle RE, Pongseree J, Padungtod P, Chuanchuen R. 2017. Prevalence and antimicrobial resistance in *Salmonella enterica* isolated from broiler chickens, pigs and meat products in Thailand–Cambodia border provinces. *Microbiol Immunol* 61:23–33.

111. Boonmar S, Bangtrakulnonth A, Pornrunangwong S, Marnrim N, Kaneko K, Ogawa M. 1998. *Salmonella* in broiler chickens in Thailand with special reference to contamination of retail meat with *Salmonella* Enteritidis. *J Vet Med Sci* 60:1233–1233.
112. Angkititrakul S, Chomvarin C, Chaita T, Kanistanon K, Waethewutajarn S. 2005. Epidemiology of antimicrobial resistance in *Salmonella* isolated from pork, chicken meat and humans in Thailand. *Southeast Asian J Trop Med Public Health* 36:1510-1515.
113. Kudaka J, Itokazu K, Taira K, Iwai A, Kondo M, Susa T, Iwanaga M. 2006. Characterization of *Salmonella* isolated in Okinawa, Japan. *Jpn J Infect Dis* 59:15-19
114. Huong LQ, Reinhard F, Padungtod P, Hanh TT, Kyule MN, Baumann MPO, Zessin KH. 2006. Prevalence of *Salmonella* in retail chicken meat in Hanoi, Vietnam. *Ann N Y Acad Sci* 1081:257–261.
115. Bangtrakulnonth A, Pornreongwong S, Pulsrikarn C, Sawanpanyalert P, Hendriksen RS, Wong DMALF, Aarestrup FM. 2004. *Salmonella* serovars from humans and other sources in Thailand, 1993–2002. *Emerg Infect Dis* 10:131–136.
116. Choi S-W, Ha J-S, Kim B-Y, Lee D-H, Park J-K, Youn H-N, Hong Y-H, Lee S-B, Lee J-B, Park S-Y, Choi I-S, Song C-S. 2014. Prevalence and characterization of *Salmonella* species in entire steps of a single integrated broiler supply chain in Korea. *Poult Sci* 93:1251–1257.
117. Vindigni SM, Srijan A, Wongstitwilairoong B, Marcus R, Meek J, Riley PL, Mason C. 2007. Prevalence of foodborne microorganisms in retail foods in Thailand. *Foodborne Pathog Dis* 4:208–215.
118. Erol I, Goncuoglu M, Ayaz ND, Ellerbroek L, Bilir Ormanci FS, Iseri Kangal O. 2013. Serotype distribution of *Salmonella* isolates from turkey ground meat and meat parts. *Biomed Res Int* 2013:1-5.

119. Phan TT, Khai LTL, Ogasawara N, Tam NT, Okatani AT, Akiba M, Hayashidani H. 2005. Contamination of *Salmonella* in retail meats and shrimps in the Mekong Delta, Vietnam. *J Food Prot* 68:1077–1080.
120. Boonmar S, Morita Y, Pulsrikarn C, Chaichana P, Pornruagwong S, Chaunchom S, Sychanh T, Khounsy T, Sisavath D, Yamamoto S, Sato H, Ishioka T, Noda M, Kozawa K, Kimura H. 2013. *Salmonella* prevalence in meat at retail markets in Pakse, Champasak Province, Laos, and antimicrobial susceptibility of isolates. *J Glob Antimicrob Resist* 1:157–161.
121. Li R, Lai J, Wang Y, Liu S, Li Y, Liu K, Shen J, Wu C. 2013. Prevalence and characterization of *Salmonella* species isolated from pigs, ducks and chickens in Sichuan Province, China. *Int J Food Microbiol* 163:14–18.
122. Niyomdecha N, Mungkornkaew N, Samosornsuk W. 2016. Serotypes and antimicrobial resistance of *Salmonella enterica* isolated from pork, chicken meat and lettuce, Bangkok and central Thailand. *Southeast Asian J Trop Med Public Health* 47:1-9.
123. Boonmar S, Bangtrakulnonth A, Pornrunangwong S, Marnrim N, Kaneko K, Ogawa M. 1998. Predominant serovars of *Salmonella* in humans and foods from Thailand. *J Vet Med Sci* 60:877–880.
124. Iwabuchi E, Yamamoto S, Endo Y, Ochiai T, Hirai K. 2011. Prevalence of *Salmonella* isolates and antimicrobial resistance patterns in chicken meat throughout Japan. *J Food Prot* 74:270–273.
125. Abatcha MG, Effarizah ME, Rusul G. 2018. Prevalence, antimicrobial resistance, resistance genes and class 1 Integrons of *Salmonella* serovars in leafy vegetables, chicken carcasses and related processing environments in Malaysian fresh food markets. *Food Control* 91:170–180.
126. Kim M-S, Lim T-H, Jang J-H, Lee D-H, Kim B-Y, Kwon J-H, Choi S-W, Noh J-Y, Hong Y-H, Lee S-B, Yang S-Y, Lee H-J, Lee J-B, Park S-Y, Choi I-S, Song C-S. 2012. Prevalence and

- antimicrobial resistance of *Salmonella* species isolated from chicken meats produced by different integrated broiler operations in Korea. *Poult Sci* 91:2370–2375.
127. Soltan Dallal MM, Sharifi Yazdi M kazem, Mirzaei N, Kalantar E. 2014. Prevalence of *Salmonella* spp. in packed and unpacked red meat and chicken in South of Tehran. *Jundishapur J Microbiol* 7:1-4.
  128. Lertworapreecha M, Sutthimusik S, Tontikapong K. 2012. Antimicrobial resistance in *Salmonella enterica* isolated from pork, chicken, and vegetables in Southern Thailand. *Jundishapur J Microbiol* 6:36–41.
  129. Cetinkaya F, Cibik R, Ece Soyutemiz G, Ozakin C, Kayali R, Levent B. 2008. *Shigella* and *Salmonella* contamination in various foodstuffs in Turkey. *Food Control* 19:1059–1063.
  130. Adesiji YO, Shivakumaraswamy SK, Deekshit VK, Kallappa GS, Karunasagar I. 2018. Molecular characterization of antimicrobial multi-drug resistance in non-typhoidal *Salmonellae* from chicken and clam in Mangalore, India. *J Biomed Res* 32:237–244.
  131. Kusumaningrum HD, Suliantrari, Devwanti H. 2012. Multidrug resistance among different serotypes of *Salmonella* isolates from fresh products in Indonesia. *Int Food Res J* 19:57–63.
  132. Petra M, Renáta K. 2017. Prevalence and characteristics of *Salmonella* in retail poultry and pork meat in the Czech Republic during 2013–2014. *Czech J food Scis* 35:106–112.
  133. Mąka Ł, Maćkiw E, Ścieżyńska H, Pawłowska K, Popowska M. 2014. Antimicrobial susceptibility of *Salmonella* strains isolated from retail meat products in Poland between 2008 and 2012. *Food Control* 36:199–204.
  134. Álvarez-Fernández E, Alonso-Calleja C, García-Fernández C, Capita R. 2012. Prevalence and antimicrobial resistance of *Salmonella* serotypes isolated from poultry in Spain: Comparison between 1993 and 2006. *Int J Food Microbiol* 153:281–287.



135. Manic M, Nikolic S, Marjanovic V, Antanasijevic S, Raicevic Z, Petrovic M. 2016. Resistance testing of *Salmonella* spp. bacteria isolated from samples derived from poultry on antimicrobial drugs. *J Dairy Vet Anim Res* 3:67–71.
136. Antunes P, Réu C, Sousa JC, Peixe L, Pestana N. 2003. Incidence of *Salmonella* from poultry products and their susceptibility to antimicrobial agents. *Int J Food Microbiol* 82:97–103.
137. Domínguez C, Gómez I, Zumalacárregui J. 2002. Prevalence of *Salmonella* and *Campylobacter* in retail chicken meat in Spain. *Int J Food Microbiol* 72:165–168.
138. Hue O, Le Bouquin S, Lalande F, Allain V, Rouxel S, Petetin I, Quesne S, Laisney M-J, Gloaguen P-Y, Picherot M, Salvat G, Bougeard S, Chemaly M. 2011. Prevalence of *Salmonella* spp. on broiler chicken carcasses and risk factors at the slaughterhouse in France in 2008. *Food Control* 22:1158–1164.
139. Clemente L, Manageiro V, Ferreira E, Jones-Dias D, Correia I, Themudo P, Albuquerque T, Caniça M. 2013. Occurrence of extended-spectrum  $\beta$ -lactamases among isolates of *Salmonella enterica* subsp. *enterica* from food-producing animals and food products, in Portugal. *Int J Food Microbiol* 167:221–228.
140. Busani L, Cigliano A, Taioli E, Caligiuri V, Chiavacci L, Di Bella C, Battisti A, Duranti A, Gianfranceschi M, Nardella MC, Ricci A, Rolesu S, Tamba M, Marabelli R, Caprioli A, Italian Group of Veterinary Epidemiology. 2005. Prevalence of *Salmonella enterica* and *Listeria monocytogenes* contamination in foods of animal origin in Italy. *J Food Prot* 68:1729–1733.
141. Jordan E, Egan J, Dullea C, Ward J, McGillicuddy K, Murray G, Murphy A, Bradshaw B, Leonard N, Rafter P, McDowell S. 2006. *Salmonella* surveillance in raw and cooked meat and meat products in the Republic of Ireland from 2002 to 2004. *Int J Food Microbiol* 112:66–70.
142. Ghafir Y, China B, Korsak N, Dierick K, Collard J-M, Godard C, De Zutter L, Daube G. 2005. Belgian surveillance plans to assess changes in *Salmonella* prevalence in meat at different

- production stages. *J Food Prot* 68:2269–2277.
143. Terentjeva M, Avsejenko J, Streikiša M, Utināne A, Kovaļenko K, Bērziņš A. 2017. Prevalence and antimicrobial resistance of *Salmonella* in meat and meat products in Latvia. *Ann Agric Environ Med* 24:317–321.
  144. Beli E, Telo A, Duraku E. 2001. *Salmonella* serotypes isolated from turkey meat in Albania. *Int J Food Microbiol* 63:165–167.
  145. Wilson IG. 2002. *Salmonella* and *Campylobacter* contamination of raw retail chickens from different producers: a six years survey. *Epidemiol Infect* 129:635–645.
  146. Capita R, Alonso-Calleja C, Prieto M. 2007. Prevalence of *Salmonella enterica* serovars and genovars from chicken carcasses in slaughterhouses in Spain. *J Appl Microbiol* 103:1366–1375.
  147. Carraturo F, Gargiulo G, Giorgio A, Aliberti F, Guida M. 2016. Prevalence, distribution, and diversity of *Salmonella* spp. in meat samples collected from Italian slaughterhouses. *J food Sci* 81:2545–2551.
  148. Chenu JW, Cox JM, Pavic A. 2012. Classification of *Salmonella enterica* serotypes from Australian poultry using repetitive sequence-based PCR. *J Appl Microbiol* 112:185–196.
  149. Fearnley E, Raupach J, Lagala F, Cameron S. 2011. *Salmonella* in chicken meat, eggs and humans, Adelaide, South Australia, 2008. *Int J Food Microbiol* 146:219–227.
  150. Heuzenroeder MW, Morgan G. 2013. An integrated typing service for the surveillance of *Salmonella* in chickens. Rural Industries Research and Development Corporation.
  151. Wong TL, Nicol C, Cook R, MacDiarmid S. 2007. *Salmonella* in uncooked retail meats in New Zealand. *J Food Prot* 70:1360–1365.
  152. Escartín EF, Lozano JS, Rodríguez O, González NM, Torres JA. 1995. Incidence and level of

- Salmonella* serovars in raw pork obtained from Mexican butcher shops. *Food Microbiol* 12:435–439.
153. Zaidi MB, McDermott PF, Fedorka-Cray P, Leon V, Canche C, Hubert SK, Abbott J, León M, Zhao S, Headrick M, Tollefson L. 2006. Nontyphoidal *Salmonella* from human clinical cases, asymptomatic children, and raw retail meats in Yucatan, Mexico. *Clin Infect Dis* 42:21–28.
  154. Schwarz P, Calveira J, Sella A, Bessa M, Barcellos DESN, Cardoso M. 2009. *Salmonella enterica*: isolation and seroprevalence in swine slaughtered in Rio Grande do Sul. *Arq Bras Med Vet Zootec* 61:1028–1034.
  155. Rondón-Barragán IS, Arcos EC, Mora-Cardona L, Fandiño C. 2015. Characterization of *Salmonella* species from pork meat in Tolima, Colombia. *RCCP* 28:74–82.
  156. Mürmann L, dos Santos MC, Cardoso M. 2009. Prevalence, genetic characterization and antimicrobial resistance of *Salmonella* isolated from fresh pork sausages in Porto Alegre, Brazil. *Food Control* 20:191–195.
  157. Hurd HS, McKEAN JD, Wesley IV, Karriker LA. 2001. The effect of lairage on *Salmonella* isolation from market swine. *J Food Prot* 64:939–944.
  158. Keelara S, Scott HM, Morrow WM, Gebreyes WA, Correa M, Nayak R, Stefanova R, Thakur S. 2013. Longitudinal study of distributions of similar antimicrobial-resistant *Salmonella* serovars in pigs and their environment in two distinct swine production systems. *Appl Environ Microbiol* 79:5167–5178.
  159. Oloya J, Doetkott D, Khaita M I. 2009. AntiMicrob Drug Resist and molecular characterization of *Salmonella* isolated from domestic animals, humans, and meat products. *Foodborne Pathog Dis* 6:273–284.
  160. Sanchez-Maldonado AF, Aslam M, Service C, Narváez-Bravo C, Avery BP, Johnson R, Jones

- TH. 2017. Prevalence and antimicrobial resistance of *Salmonella* isolated from two pork processing plants in Alberta, Canada. *Int J Food Microbiol* 241:49–59.
161. Schmidt JW, Brichta-Harhay DM, Kalchayanand N, Bosilevac JM, Shackelford SD, Wheeler TL, Koohmaraie M. 2012. Prevalence, enumeration, serotypes, and antimicrobial resistance phenotypes of *Salmonella enterica* isolates from carcasses at two large United States pork processing plants. *Appl Environ Microbiol* 78:2716–2726.
162. Gaul SB, Wedel S, Erdman MM, Harris DL, Harris IT, Ferris KE, Hoffman L. 2007. Use of pulsed-field gel electrophoresis of conserved *Xba*I Fragments for Identification of swine *Salmonella* serotypes. *J Clin Microbiol* 45:472–476.
163. Brooks JC, Loneragan GH, Brashears MM. 2014. Determining the prevalence and antimicrobial susceptibility of *Salmonella* serovars isolated from U.S. retail ground pork. Research Report, Pork Safety 1-38.
164. Wang B, Wesley IV, McKean JD, O'Connor AM. 2010. Sub-iliac lymph nodes at slaughter lack ability to predict *Salmonella enterica* prevalence for swine farms. *Foodborne Pathog Dis* 7:795–800.
165. Molla B, Berhanu A, Muckle A, Cole L, Wilkie E, Kleer J, Hildebrandt G. 2006. Multidrug resistance and distribution of *Salmonella* serovars in slaughtered pigs. *J Vet Med* 53:28–33.
166. Aragaw K, Molla B, Muckle A, Cole L, Wilkie E, Poppe C, Kleer J, Hildebrandt G. 2007. The characterization of *Salmonella* serovars isolated from apparently healthy slaughtered pigs at Addis Ababa abattoir, Ethiopia. *Prev Vet Med* 82:252–261.
167. Kikvi GM, Ombui JN, Mitema ES. 2010. Serotypes and antimicrobial resistance profiles of *Salmonella* isolates from pigs at slaughter in Kenya. *J Infect Dev Ctries* 4:243-248.
168. Ejeta G, Molla B, Alemayehu D, Muckle A. 2004. *Salmonella* serotypes isolated from minced

- meat beef, mutton and pork in Addis Ababa, Ethiopia. *Revue Méd Vét* 11:547-551.
169. Cai Y, Tao J, Jiao Y, Fei X, Zhou L, Wang Y, Zheng H, Pan Z, Jiao X. 2016. Phenotypic characteristics and genotypic correlation between *Salmonella* isolates from a slaughterhouse and retail markets in Yangzhou, China. *Int J Food Microbiol* 222:56–64.
170. Dahshan H, Chuma T, Shahada F, Akiba M, Fujimoto H, Akasaka K, Kamimura Y, Okamoto K. 2010. Characterization of antibiotic resistance and the emergence of AmpC-Producing *Salmonella* infants from pigs. *J Vet Med Sci* 72:1437–1442.
171. Pulsrikarn C, Chaichana P, Pornruangwong S. 2012. Serotype, antimicrobial susceptibility, and genotype of *Salmonella* isolates from swine and pork in Sa Kaew province, Thailand. *Thai J Vet Med* 42: 21-27.
172. Li Y, Cai Y, Tao J, Kang X, Jiao Y, Guo R, Wang G, Pan Z, Jiao X. 2016. *Salmonella* isolated from the slaughterhouses and correlation with pork contamination in free market. *Food Control* 59:591–600.
173. Boonmar S, Markvichitr K, Chaunchom S, Chanda C, Bangtrakulnonth A, Pornrunangwong S, Yamamoto S, Suzuki D, Kozawa K, Kimura H, Morita Y. 2008. *Salmonella* prevalence in slaughtered buffaloes and pigs and antimicrobial susceptibility of isolates in Vientiane, Lao people's Democratic Republic. *J Vet Med Sci* 70:1345–1348.
174. Ng KCS, Rivera WL. 2014. Antimicrobial resistance of *Salmonella enterica* isolates from tonsil and jejunum with lymph node tissues of slaughtered swine in metro Manila, Philippines. *ISRN Microbiol* 2014:1-9.
175. Sanguankiat A, Pinthong R, Padungtod P, Baumann MPO, Zessin K-H, Srikitjakarn L, Fries R. 2010. A cross-sectional study of *Salmonella* in pork products in Chiang Mai, Thailand. *Foodborne Pathog Dis* 7:873–878.

176. Banks JG, Board RG. 1983. The incidence and level of contamination of British fresh sausages and ingredients with salmonellas. *J Hyg (Lond)* 90:213–223.
177. Mannion C, Fanning J, McLernon J, Lendrum L, Gutierrez M, Duggan S, Egan J. 2012. The role of transport, lairage and slaughter processes in the dissemination of *Salmonella* spp. in pigs in Ireland. *Food Res Int* 45:871–879.
178. Swanenburg M, Urlings HAP, Snijders JMA, Keuzenkamp DA, van Knapen F. 2001. *Salmonella* in slaughter pigs: prevalence, serotypes and critical control points during slaughter in two slaughterhouses. *Int J Food Microbiol* 70:243–254.
179. Botteldoorn N, Heyndrickx M, Rijpens N, Grijspeerdt K, Herman L. 2003. *Salmonella* on pig carcasses: positive pigs and cross contamination in the slaughterhouse. *J Appl Microbiol* 95:891–903.
180. Bonardi S, Alpigiani I, Bruini I, Barilli E, Brindani F, Morganti M, Cavallini P, Bolzoni L, Pongolini S. 2016. Detection of *Salmonella enterica* in pigs at slaughter and comparison with human isolates in Italy. *Int J Food Microbiol* 218:44–50.
181. Bolton DJ, Ivory C, McDowell D. 2013. A study of *Salmonella* in pigs from birth to carcass: Serotypes, genotypes, antibiotic resistance and virulence profiles. *Int J Food Microbiol* 160:298–303.
182. Bonardi S, Bassi L, Brindani F, D’Incau M, Barco L, Carra E, Pongolini S. 2013. Prevalence, characterization and antimicrobial susceptibility of *Salmonella enterica* and *Yersinia enterocolitica* in pigs at slaughter in Italy. *Int J Food Microbiol* 163:248–257.
183. De Busser EV, Maes D, Houf K, Dewulf J, Imberechts H, Bertrand S, De Zutter L. 2011. Detection and characterization of *Salmonella* in lairage, on pig carcasses and intestines in five slaughterhouses. *Int J Food Microbiol* 145:279–286.

184. Figueiredo R, Henriques A, Sereno R, Mendonça N, da Silva GJ. 2015. Antimicrobial resistance and extended-spectrum  $\beta$ -lactamases of *Salmonella enterica* serotypes isolated from livestock and processed food in Portugal: an update. *Foodborne Pathog Dis* 12:110–117.
185. Giovannacci I, Queguiner S, Ragimbeau C, Salvat G, Vendevre JL, Carlier V, Ermel G. 2001. Tracing of *Salmonella* spp. in two pork slaughter and cutting plants using serotyping and macro-restriction genotyping. *J Appl Microbiol* 90:131–147.
186. Gomes-Neves E, Antunes P, Tavares A, Themudo P, Cardoso MF, Gärtner F, Costa JM, Peixe L. 2012. *Salmonella* cross-contamination in swine abattoirs in Portugal: carcasses, meat and meat handlers. *Int J Food Microbiol* 157:82–87.
187. Hernández M, Gómez-Laguna J, Luque I, Herrera-León S, Maldonado A, Reguillo L, Astorga RJ. 2013. *Salmonella* prevalence and characterization in a free-range pig processing plant: tracking in trucks, lairage, slaughter line and quartering. *Int J Food Microbiol* 162:48–54.
188. Lomonaco S, Decastelli L, Bianchi DM, Nucera D, Grassi MA, Sperone V, Civera T. 2009. Detection of *Salmonella* in finishing pigs on farm and at slaughter in Piedmont, Italy. *Zoonoses Public Health* 56:137–144.
189. McDowell SW, Porter R, Madden R, Cooper B, Neill SD. 2007. *Salmonella* in slaughter pigs in Northern Ireland: prevalence and use of statistical modelling to investigate sample and abattoir effects. *Int J Food Microbiol* 118:116–125.
190. Piras F, Brown DJ, Meloni D, Mureddu A, Mazzette R. 2011. Investigation of *Salmonella enterica* in Sardinian slaughter pigs: prevalence, serotype and genotype characterization. *Int J Food Microbiol* 151:201–209.
191. Vico JP, Rol I, Garrido V, San Román B, Grilló MJ, Mainar-Jaime RC. 2011. Salmonellosis in finishing pigs in Spain: prevalence, antimicrobial agent susceptibilities, and risk factor analysis. *J Food Prot* 74:1070–1078.

192. Baggesen DL, Wegener HC, Bager F, Stege H, Christensen J. 1996. Herd prevalence of *Salmonella enterica* infections in Danish slaughter pigs determined by microbiological testing. *Preventive Veterinary Medicine* 26:201–213.
193. Sørensen LL, Alban L, Nielsen B, Dahl J. 2004. The correlation between *Salmonella* serology and isolation of *Salmonella* in Danish pigs at slaughter. *Vet Microbiol* 101:131–141.
194. Swanenburg M, van der Wolf PJ, Urlings HAP, Snijders JMA, van Knapen F. 2001. *Salmonella* in slaughter pigs: the effect of logistic slaughter procedures of pigs on the prevalence of *Salmonella* in pork. *Int J Food Microbiol* 70:231–242.
195. Karpíšková R, Pospíšilová P, Koláčková I. 2011. A comparison of *Salmonella* occurrence in pork meat and meat products. *Maso International Brno* 1:3–6.
196. Piras F, Fois F, Mazza R, Putzolu M, Delogu ML, Lochi PG, Pani SP, Mazzette R. 2014. *Salmonella* prevalence and microbiological contamination of pig carcasses and slaughterhouse environment. *Ital J Food Saf* 3:210-213.
197. Pesciaroli M, Cucco L, De Luca S, Massacci FR, Maresca C, Medici L, Paniccià M, Scoccia E, Staffolani M, Pezzotti G, Magistrali CF. 2017. Association between pigs with high caecal *Salmonella* loads and carcass contamination. *Int J Food Microbiol* 242:82–86.
198. Hamilton DR, Smith P, Pointon A. 2007. National *Salmonella* and *E. coli* Monitoring (ESAM) data from Australian pig carcasses from 2000 to 2006, p. 129–132. *In International Conference on the Epidemiology and Control of Biological, Chemical and Physical Hazards in Pigs and Pork*. Iowa State University, Digital Press, Verona, Italy.
199. Gilbert S, Cressey P, Hudson DA, King N. 2010. Prepared as part of a New Zealand Food Safety Authority contract for scientific services.
200. Iglesias MA, Kroning IS, Decol LT, de Melo Franco BDG, Silva WP da. 2017. Occurrence and



- phenotypic and molecular characterization of *Listeria monocytogenes* and *Salmonella* spp. in slaughterhouses in southern Brazil. *Food Res Int* 100:96–101.
201. Cunha-Neto A, Castro V, Carvalho L, Rodrigues DP, Mano S, Figueiredo EE, Conte-Junior CA. 2017. Serotypes and antimicrobial resistance profiles of *Salmonella* isolated from fresh beef processing and chilled fresh beef samples produced and marketed in the metropolitan region of Cuiaba, in the State of Mato Grosso, Brazil. *African J Microbiol Research* 11:1626–1631.
  202. Martínez-Chávez L, Cabrera-Díaz E, Pérez-Montaña JA, Garay-Martínez LE, Varela-Hernández JJ, Castillo A, Lucia L, Ávila-Novo MG, Cardona-López MA, Gutiérrez-González P, Martínez-González NE. 2015. Quantitative distribution of *Salmonella* spp. and *Escherichia coli* on beef carcasses and raw beef at retail establishments. *Int J Food Microbiol* 210:149–155.
  203. Cabrera-Díaz E, Barbosa-Cardenas CM, Perez-Montaña JA, Gonzalez-Aguilar D, Pacheco-Gallardo C, Barba J. 2013. Occurrence, serotype diversity, and antimicrobial resistance of *Salmonella* in ground beef at retail stores in Jalisco State, Mexico. *J Food Prot* 76:2004–2010.
  204. Perez-Montaña JA, Gonzalez-Aguilar D, Barba J, Pacheco-Gallardo C, Campos-Bravo CA, Garcia S, Heredia NL, Cabrera-Díaz E. 2012. Frequency and antimicrobial resistance of *Salmonella* serotypes on beef carcasses at small abattoirs in Jalisco State, Mexico. *J Food Prot* 75:867–873.
  205. Gragg SE, Loneragan GH, Nightingale KK, Brichta-Harhay DM, Ruiz H, Elder JR, Garcia LG, Miller MF, Echeverry A, Porras RGR, Brashears MM. 2013. Substantial within-animal diversity of *Salmonella* isolates from lymph nodes, feces, and hides of cattle at slaughter. *Appl Environ Microbiol* 79:4744–4750.
  206. Varela-Guerrero JA, Talavera-Rojas M, Gutiérrez-Castillo A del C, Reyes-Rodríguez NE, Vázquez-Guadarrama J. 2013. Phenotypic–genotypic resistance in *Salmonella* spp. isolated from cattle carcasses from the north central zone of the State of Mexico. *Trop Anim Health Prod*

- 45:995–1000.
207. Ribeiro VB, Andrigheto C, Bersot LS, Barcellos V, Reis EF, Destro MT. 2007. Serological and genetic diversity amongst *Salmonella* strains isolated in a salami processing line. *Braz J Microbiol* 38:178–182.
  208. Cossi MVC, Burin RCK, Camargo AC, Dias MR, Lanna FGPA, Pinto PS de A, Nero LA. 2014. Low occurrence of *Salmonella* in the beef processing chain from Minas Gerais state, Brazil: From bovine hides to end cuts. *Food Control* 40:320–323.
  209. Arthur TM, Bosilevac JM, Brichta-Harhay DM, Kalchayanand N, King DA, Shackelford SD, Wheeler TL, Koohmaraie M. 2008. Source tracking of *Escherichia coli* O157:H7 and *Salmonella* contamination in the lairage environment at commercial U.S. beef processing plants and identification of an effective intervention. *J Food Prot* 71:1752–1760.
  210. Kunze DJ, Loneragan GH, Platt TM, Miller MF, Besser TE, Koohmaraie M, Stephens T, Brashears MM. 2008. *Salmonella enterica* burden in harvest-ready cattle populations from the southern high plains of the United States. *Appl Environ Microbiol* 74:345–351.
  211. Gragg SE, Loneragan GH, Brashears MM, Arthur TM, Bosilevac JM, Kalchayanand N, Wang R, Schmidt JW, Brooks JC, Shackelford SD, Wheeler TL, Brown TR, Edrington TS, Brichta-Harhay DM. 2013. Cross-sectional study examining *Salmonella enterica* carriage in subiliac lymph nodes of cull and feedlot cattle at harvest. *Foodborne Pathog Dis* 10:368–374.
  212. Bosilevac JM, Arthur TM, Bono JL, Brichta-Harhay DM, Kalchayanand N, King DA, Shackelford SD, Wheeler TL, Koohmaraie M. 2009. Prevalence and enumeration of *Escherichia coli* O157:H7 and *Salmonella* in U.S. abattoirs that process fewer than 1,000 head of cattle per day. *J Food Prot* 72:1272–1278.
  213. Zhao S, McDermott PF, Friedman S, Abbott J, Ayers S, Glenn A, Hall-Robinson E, Hubert SK, Harbottle H, Walker RD, Chiller TM, White DG. 2006. Antimicrobial resistance and genetic

- relatedness among *Salmonella* from retail foods of animal origin: NARMS retail meat surveillance. *Foodborne Pathog Dis* 3:106–117.
214. Galland JC, House JK, Hyatt DR, Hawkins LL, Anderson NV, Irwin CK, Smith BP. 2000. Prevalence of *Salmonella* in beef feeder steers as determined by bacterial culture and ELISA serology. *Vet Microbiol* 76:143–151.
215. Muñoz-Vargas L, Finney SK, Hutchinson H, Masterson MA, Habing G. 2017. Impact of clinical salmonellosis in veal calves on the recovery of *Salmonella* in lymph nodes at Harvest. *Foodborne Pathog Dis* 14:678–685.
216. Arthur TM, Brichta-Harhay DM, Bosilevac JM, Guerini MN, Kalchayanand N, Wells JE, Shackelford SD, Wheeler TL, Koohmaraie M. 2008. Prevalence and characterization of *Salmonella* in bovine lymph nodes potentially destined for use in ground beef. *J Food Prot* 71:1685–1688.
217. Sallam KI, Mohammed MA, Hassan MA, Tamura T. 2014. Prevalence, molecular identification and antimicrobial resistance profile of *Salmonella* serovars isolated from retail beef products in Mansoura, Egypt. *Food Control* 38:209–214.
218. Murgia M, Bouchrif B, Timinouni M, Al-Qahtani A, Al-Ahdal MN, Cappuccinelli P, Rubino S, Paglietti B. 2015. Antibiotic resistance determinants and genetic analysis of *Salmonella enterica* isolated from food in Morocco. *Int J Food Microbiol* 215:31–39.
219. Sibhat B, Zewde BM, Zerihun A, Muckle A, Cole L, Boerlin P, Wilkie E, Perets A, Mistry K, Gebreyes WA. 2011. *Salmonella* serovars and antimicrobial resistance profiles in beef cattle, slaughterhouse personnel and slaughterhouse environment in Ethiopia. *Zoonoses Public Health* 58:102–109.
220. Shilangale R, Kaaya G, Chimwamurombe P. 2015. Prevalence and characterization of *Salmonella* isolated from beef in Namibia. *EJNFS* 5:267–274.

221. Mrema N, Mpuchane S, Gashe BA. 2006. Prevalence of *Salmonella* in raw minced meat, raw fresh sausages and raw burger patties from retail outlets in Gaborone, Botswana. *Food Control* 17:207–212.
222. Ketema L, Ketema Z, Kiflu B, Alemayehu H, Terefe Y, Ibrahim M, Eguale T. 2018. Prevalence and antimicrobial susceptibility profile of *Salmonella* serovars isolated from slaughtered cattle in Addis Ababa, Ethiopia. *Biomed Res Int* 2018:1-7
223. Alemu S, Zewde BM. 2012. Prevalence and antimicrobial resistance profiles of *Salmonella enterica* serovars isolated from slaughtered cattle in Bahir Dar, Ethiopia. *Trop Anim Health Prod* 44:595–600.
224. Madoroba E, Kapeta D, Gelaw AK. 2016. *Salmonella* contamination, serovars and antimicrobial resistance profiles of cattle slaughtered in South Africa. *Onderstepoort J Vet Res* 83:1-8.
225. Oueslati W, Rjeibi MR, Mhadhbi M, Jbeli M, Zrelli S, Ettriqui A. 2016. Prevalence, virulence and antibiotic susceptibility of *Salmonella* spp. strains, isolated from beef in Greater Tunis (Tunisia). *Meat Sci* 119:154–159.
226. Ed-dra A, Filali FR, Karraouan B, El Allaoui A, Aboukacem A, Bouchrif B. 2017. Prevalence, molecular and antimicrobial resistance of *Salmonella* isolated from sausages in Meknes, Morocco. *Microb Pathog* 105:340–345.
227. Hiko A, Irsigler H, Ameni G, Zessin K-H, Fries R. 2016. *Salmonella* serovars along two beef chains in Ethiopia. *J Infect Dev Ctries* 10:1168–1176.
228. Adesiyun AA, Oni OO. 1989. Prevalence and antibiograms of *Salmonellae* in slaughter cattle, slaughter areas and effluents in Zaria abattoir, Nigeria. *J Food Prot* 52:232–235.
229. Kebede A, Kemal J, Alemayehu H, Habte Mariam S. 2016. Isolation, identification, and antibiotic susceptibility testing of *Salmonella* from slaughtered bovines and ovine in Addis

- Ababa abattoir enterprise, Ethiopia: a cross-sectional study. *Int J Bacteriol* 2016:1-6.
230. Fashae K, Leekitcharoenphon P, Hendriksen RS. 2018. Phenotypic and genotypic comparison of *Salmonellae* from diarrheic and healthy humans and cattle, Nigeria. *Zoonoses Public Health* 65:185–195.
231. Stevens A, Kaboré Y, Perrier-Gros-Claude J-D, Millemann Y, Brisabois A, Catteau M, Cavin J-F, Dufour B. 2006. Prevalence and antibiotic-resistance of *Salmonella* isolated from beef sampled from the slaughterhouse and from retailers in Dakar (Senegal). *Int J Food Microbiol* 110:178–186.
232. Ibrahim M. 2016. Prevalence of *Salmonella* species in minced beef and meat handlers and their drug resistance. *Alex J Vet Sci* 49:122-128.
233. Kore K, Asrade B, Demissie K, Aragaw K. 2017. Characterization of *Salmonella* isolated from apparently healthy slaughtered cattle and retail beef in Hawassa, Southern Ethiopia. *Prev Vet Med* 147:11–16.
234. Dong P, Zhu L, Mao Y, Liang R, Niu L, Zhang Y, Li K, Luo X. 2014. Prevalence and profile of *Salmonella* from samples along the production line in Chinese beef processing plants. *Food Control* 38:54–60.
235. Wiczorek K, Osek J. 2013. Prevalence and characterisation of *Salmonella* in slaughtered cattle and beef in Poland. *Bull Vet Inst Pulawy* 57:607–611.
236. McEvoy JM, Doherty AM, Sheridan JJ, Blair IS, McDowell DA. 2003. The prevalence of *Salmonella* spp. in bovine faecal, rumen and carcass samples at a commercial abattoir. *J Appl Microbiol* 94:693–700.
237. Small A, James C, James S, Davies R, Liebana E, Howell M, Hutchison M, Buncic S. 2006. Presence of *Salmonella* in the red meat abattoir lairage after routine cleansing and disinfection

- and on carcasses. J Food Prot 69:2342–2351.
238. Fegan N, Vanderlinde P, Higgs G, Desmarchelier P. 2005. A study of the prevalence and enumeration of *Salmonella enterica* in cattle and on carcasses during Processing. J Food Prot 68:1147–1153.
239. Fegan N, Vanderlinde P, Higgs G, Desmarchelier P. 2004. Quantification and prevalence of *Salmonella* in beef cattle presenting at slaughter. J Appl Microbiol 97:892–898.
240. 2014. *Salmonella* in manufacturing beef survey. Meat and Livestock Australia Limited, Locked Bag 991 North Sydney Nsw 2059.
241. Bailey G, Huynh L, Govenlock L, Jordan D, Jenson I. 2017. Low prevalence of *Salmonella* and Shiga Toxin-producing *Escherichia coli* in lymph nodes of Australian beef cattle. J Food Prot 80:2105–2111.
242. dos Santos RR, Xavier RGC, de Oliveira TF, Leite RC, Figueiredo HCP, Leal CAG. 2018. Occurrence, genetic diversity, and control of *Salmonella enterica* in native Brazilian farmed fish. Aquaculture 501:304-312.
243. Carvalho FC, Sousa OV, Carvalho EM, Hofer E, Vieira RH. 2013. Antibiotic resistance of *Salmonella* spp. isolated from shrimp farming freshwater environment in Northeast Region of Brazil. J Pathog 2013:685193–685193.
244. Ribeiro RV, Reis EMF, Reis CMF, Freitas-Almeida AC, Rodrigues DP. 2010. Incidence and antimicrobial resistance of entero-pathogens isolated from an integrated aquaculture system. Lett Appl Microbiol 51:611–618.
245. Miranda AL, Cordeiro SM, Reis JN, Cardoso LG, Guimarães AG, Miranda AL, Cordeiro SM, Reis JN, Cardoso LG, Guimarães AG. 2017. Phenotypic and genotypic characterization of *Salmonella* spp. isolated from foods and clinical samples in Brazil. An Acad Bras Cienc

- 89:1143–1153.
246. Brillhart CD, Joens LA. 2011. Prevalence and characterization of *Salmonella* serovars isolated from oysters served raw in restaurants. *J Food Prot* 74:1025–1029.
247. Bae D, Kweon O, Khan AA. 2016. Isolation and characterization of antimicrobial-resistant Nontyphoidal *Salmonella enterica* serovars from imported Food Products. *J Food Prot* 79:1348–1354.
248. Heinitz ML, Ruble RD, Wagner DE, Tatini SR. 2000. Incidence of *Salmonella* in fish and seafood. *J Food Prot* 63:579–592.
249. Brands DA, Inman AE, Gerba CP, Maré CJ, Billington SJ, Saif LA, Levine JF, Joens LA. 2005. Prevalence of *Salmonella* spp. in oysters in the United States. *Appl Environ Microbiol* 71:893–897.
250. Koonse B, Burkhardt W, Chirtel S, Hoskin GP. 2005. *Salmonella* and the sanitary quality of aquacultured shrimp. *J Food Prot* 68:2527–2532.
251. Fraiser MB, Koburger JA. 1984. Incidence of *Salmonellae* in clams, oysters, crabs and mullet. *J Food Prot* 47:343–345.
252. Raufu IA, Lawan FA, Bello HS, Musa AS, Ameh JA, Ambali AG. 2014. Occurrence and antimicrobial susceptibility profiles of *Salmonella* serovars from fish in Maiduguri, sub-Saharan, Nigeria. *Egypt J Aquat Res* 40:59–63.
253. Setti I, Rodriguez-Castro A, Pata MP, Cadarso-Suarez C, Yacoubi B, Bensmael L, Moukrim A, Martinez-Urtaza J. 2009. Characteristics and dynamics of *Salmonella* contamination along the Coast of Agadir, Morocco. *Appl Environ Microbiol* 75:7700–7709.
254. Traoré O, Nyholm O, Siitonen A, Bonkougou IJO, Traoré AS, Barro N, Haukka K. 2015. Prevalence and diversity of *Salmonella enterica* in water, fish and lettuce in Ouagadougou,

- Burkina Faso. *BMC Microbiol* 15:1-7.
255. Kumar R, Surendran PK, Thampuran N. 2009. Distribution and genotypic characterization of *Salmonella* serovars isolated from tropical seafood of Cochin, India. *J Appl Microbiol* 106:515–524.
256. Iyer TSG. 1989. On the Pattern of *Salmonella* serotypes in fishery products, frog legs a processing environment. *Fishery Technology* 26:1-6.
257. Yang X, Wu Q, Zhang J, Huang J, Chen L, Liu S, Yu S, Cai S. 2015. Prevalence, enumeration, and characterization of *Salmonella* isolated from aquatic food products from retail markets in China. *Food Control* 57:308–313.
258. Zhang J, Yang X, Kuang D, Shi X, Xiao W, Zhang J, Gu Z, Xu X, Meng J. 2015. Prevalence of antimicrobial resistance of non-typhoidal *Salmonella* serovars in retail aquaculture products. *Int J Food Microbiol* 210:47–52.
259. Budiati T, Rusul G, Wan-Abdullah WN, Arip YM, Ahmad R, Thong KL. 2013. Prevalence, antibiotic resistance and plasmid profiling of *Salmonella* in catfish (*Clarias gariepinus*) and tilapia (*Tilapia mossambica*) obtained from wet markets and ponds in Malaysia. *Aquaculture* 372–375:127–132.
260. Rahimi E, Shakerian A, Falavarjani AG. 2013. Prevalence and antimicrobial resistance of *Salmonella* isolated from fish, shrimp, lobster, and crab in Iran. *Comp Clin Pathol* 22:59–62.
261. Banerjee S, Ooi MC, Shariff M, Khatoon H. 2012. Antibiotic resistant *Salmonella* and *Vibrio* associated with farmed *Litopenaeus vannamei*. *The Scientific World Journal* 2012:1-6.
262. Rubini S, Galletti G, D’Incau M, Govoni G, Boschetti L, Berardelli C, Barbieri S, Merialdi G, Formaglio A, Guidi E, Bergamini M, Piva S, Serraino A, Giacometti F. 2018. Occurrence of *Salmonella enterica* subsp. *enterica* in bivalve molluscs and associations with *Escherichia coli*



- in molluscs and faecal coliforms in seawater. *Food Control* 84:429–435.
263. Martinez-Urtaza J, Saco M, Hernandez-Cordova G, Lozano A, Garcia-Martin O, Espinosa J. 2003. Identification of *Salmonella* serovars isolated from live molluscan shellfish and their significance in the marine environment. *J Food Prot* 66:226–232.
264. Martinez-Urtaza J, Saco M, de Novoa J, Perez-Piñeiro P, Peiteado J, Lozano-Leon A, Garcia-Martin O. 2004. Influence of environmental factors and human activity on the presence of *Salmonella* serovars in a marine environment. *Appl Environ Microbiol* 70:2089–2097.
265. Wilson IG, Moore JE. 1996. Presence of *Salmonella* spp. and *Campylobacter* spp. in shellfish. *Epidemiol Infect* 116:147–153.
266. Peterson R, Hariharan H, Matthew V, Chappell S, Davies R, Parker R, Sharma R. 2013. Prevalence, serovars, and antimicrobial susceptibility of *Salmonella* isolated from blue land crabs (*Cardisoma guanhumi*) in Grenada, West Indies. *J Food Prot* 76:1270–1273.
